## **Divergent encoding of active avoidance behavior in corticostriatal and corticolimbic projections**

Bridget L. Kajs<sup>1,\*</sup>, Adrienne C. Loewke<sup>1,\*</sup>, Jeffrey M. Dorsch<sup>1</sup>, Leah T. Vinson<sup>2</sup>, Lisa A. Gunaydin<sup>1,3,†</sup>

<sup>1</sup> Department of Psychiatry and Behavioral Sciences, University of California San Francisco, San Francisco CA

<sup>2</sup> Department of Neurology, University of California San Francisco, San Francisco CA

<sup>3</sup> Kavli Institute for Fundamental Neuroscience, University of California San Francisco, San Francisco CA

\* These authors contributed equally.

† Corresponding author ([lisa.gunaydin@ucsf.edu](mailto:lisa.gunaydin@ucsf.edu))

## ABSTRACT

Active avoidance behavior, in which an animal performs an action to avoid a stressor, is crucial for survival and may provide insight into avoidance behaviors seen in anxiety disorders. Active avoidance requires the dorsomedial prefrontal cortex (dmPFC), which is thought to regulate avoidance via downstream projections to the striatum and amygdala. However, the endogenous activity of projection-defined dmPFC subpopulations during active avoidance learning remains unexplored. Here we utilized fiber photometry to record from the dmPFC and its downstream projections to the dorsomedial striatum (DMS) and the basolateral amygdala (BLA) during active avoidance learning in mice. We examined neural activity during conditioned stimulus (CS) presentations, active avoidance, and cued freezing. Both prefrontal projections showed learning-related increases in activity during CS onset throughout active avoidance training. The dmPFC as a whole showed increased activity during avoidance and decreased activity during cued freezing. Finally, dmPFC-DMS and dmPFC-BLA projections showed divergent encoding of active avoidance behavior, with the dmPFC-DMS projection showing increased activity and the dmPFC-BLA showing decreased activity during active avoidance. Our results identify differential prefrontal encoding of active and passive coping behaviors in the same behavioral paradigm and demonstrate divergent encoding of active avoidance in projection-specific dmPFC subpopulations.

## INTRODUCTION

1 Active avoidance is a behavioral coping strategy in which an organism performs an action to avoid  
2 a stressor and can be adaptively enacted to evade danger and ensure survival. However, active  
3 avoidance can become maladaptive when used in excess or in response to overexaggerated  
4 perceived threats as seen in anxiety disorders. Despite its high clinical relevance, our  
5 understanding of the neurobiological basis of active avoidance has lagged far behind other  
6 behaviors relevant to anxiety disorders such as approach-avoidance decision making or fear  
7 learning (LeDoux et al., 2017). The dorsomedial prefrontal cortex (dmPFC) is an attractive  
8 candidate to explore in the context of active avoidance given its clear ties to anxiety disorder  
9 pathophysiology (Holzschneider & Mulert, 2011; Rauch & Shin, 2002) and avoidance behavior in  
10 humans (Collins et al., 2014; Delgado et al., 2009) as well as clinically relevant behaviors in  
11 rodents (Giustino & Maren, 2015; Tovote et al., 2015). In non-psychiatric populations, dmPFC  
12 activity is associated with active avoidance learning (Collins et al., 2014) while in post-traumatic  
13 stress disorder (PTSD) patients, dmPFC activation during fear extinction positively correlates with  
14 patients' avoidance symptoms (Sripada et al., 2013). In rodents, dmPFC plays a crucial role in  
15 associative fear learning (Adhikari et al., 2015; Corcoran & Quirk, 2007; Courtin et al., 2014;  
16 Dejean et al., 2016; Fenton et al., 2014; Giustino & Maren, 2015; Herry & Johansen, 2014; Klavir  
17 et al., 2017; Marek et al., 2018; Meyer et al., 2019; Sharpe & Killcross, 2014; Sierra-Mercado et  
18 al., 2011; Sotres-Bayon et al., 2012; Tovote et al., 2015) and instrumental action-outcome  
19 learning (Gourley & Taylor, 2016; Grace et al., 2007; Peters et al., 2005; Pinto & Dan, 2015), both  
20 of which are components of active avoidance behavior. Studies have directly demonstrated the  
21 importance of the dmPFC for a variety of avoidance behaviors including real time and conditioned  
22 place avoidance (Huang et al., 2020; Lee et al., 2014; Vander Weele et al., 2018), inhibitory  
23 avoidance (Garrido et al., 2012; Ito & Morozov, 2019; Izquierdo et al., 2007; Torres-García et al.,  
24 2017; Zhang et al., 2011), approach-avoidance decision making (Friedman et al., 2015; Loewke

25 et al., 2021), and active avoidance (Beck et al., 2014; Bravo-Rivera et al., 2014; Capuzzo &  
26 Floresco, 2020; Diehl et al., 2018, 2020). One recent study using the platform-mediated active  
27 avoidance task showed that suppression of dmPFC activity is associated with avoidance learning  
28 (Diehl et al., 2018). Another study using a discriminative two-way active avoidance paradigm  
29 found that dmPFC population activity alone could be used to decode conditioned stimulus (CS)  
30 identity between a conditioned stimulus that predicted shock and led to robust avoidance behavior  
31 (CS+) and a conditioned stimulus that did not predict to shock and did not lead to avoidance (CS-  
32 ) (Jercog et al., 2021). In these studies, task-relevant neural activity in the dmPFC during active  
33 avoidance has only been examined on the final day of active avoidance training after learning has  
34 already occurred. To our knowledge, no studies have thoroughly examined dmPFC activity  
35 throughout avoidance learning. Investigating how task-relevant signals in the dmPFC develop in  
36 real time across days of learning could help determine whether the dmPFC is preferentially  
37 recruited during certain stages of learning or whether task-relevant dmPFC activity requires  
38 consolidation across days.

39 Further dissecting the dmPFC into subpopulations based on their projection target may also yield  
40 more refined insights into the nuanced and varied roles of the dmPFC in active avoidance  
41 behavior. One downstream target of the dmPFC that has been consistently tied to active  
42 avoidance behavior is the basolateral amygdala (BLA) (Amorapanth et al., 2000; Bravo-Rivera et  
43 al., 2014; Choi et al., 2010; Darvas et al., 2011; Diehl et al., 2020; Killcross et al., 1997; Kyriazi et  
44 al., 2018; Lázaro-Muñoz et al., 2010; Maren et al., 1991; Poremba & Gabriel, 1999). The BLA has  
45 subpopulations of cells that specifically encode successful active avoidance behavior (Kyriazi et  
46 al., 2018), and inactivating the BLA impairs platform-mediated active avoidance behavior (Bravo-  
47 Rivera et al., 2014). Additionally, the dmPFC-BLA projection has been directly tied to active  
48 avoidance, as optogenetically stimulating or inhibiting this projection bidirectionally affects  
49 platform-mediated active avoidance behavior (Diehl et al., 2020). However, despite these

50 optogenetic studies suggesting a causal role of this projection in avoidance behavior, no studies  
51 have directly recorded the endogenous activity in this projection subpopulation during active  
52 avoidance learning or expression. The task-relevant information of the dmPFC-BLA projection in  
53 active avoidance could be multifold. dmPFC-BLA projections could signal crucial information  
54 about the cue-shock association, as the BLA receives associative information that has converged  
55 upstream in the lateral amygdala (LA) (Duvarci & Pare, 2014; Tovote et al., 2015). dmPFC-BLA  
56 projections may also directly impact behavioral output by amplifying avoidance information sent  
57 to the nucleus accumbens (LeDoux et al., 2017; Ramirez et al., 2015) and suppressing fearful  
58 freezing information sent to the central amygdala (LeDoux et al., 2017; Terburg et al., 2018).  
59 However, it remains unknown how the real-time neural dynamics in this projection encode active  
60 avoidance, which would require projection-specific recording of dmPFC-BLA projection neurons  
61 during avoidance learning and expression.

62 While corticolimbic projections have been heavily studied in the context of fear conditioning,  
63 recent evidence suggests that corticostriatal projections also play a key role in avoidance behavior  
64 (Friedman et al., 2015; Loewke et al., 2021). Human fMRI studies have implicated both the dorsal  
65 and ventral striatum in active avoidance behavior (Boeke et al., 2017; Collins et al., 2014; Delgado  
66 et al., 2009). However, while the ventral striatum has been more thoroughly studied in rodent  
67 models (Bravo-Rivera et al., 2014, 2015; Darvas et al., 2011; Gentry et al., 2016; Oleson et al.,  
68 2012; Piantadosi et al., 2018; Ramirez et al., 2015; Rodriguez-Romaguera et al., 2016; Stelly et  
69 al., 2019; Wenzel et al., 2018), there has been less exploration into the role of the dorsal striatum  
70 in active avoidance (Boschen et al., 2011; Dombrowski et al., 2013; Wendler et al., 2014;  
71 Wietzikoski et al., 2012). dmPFC projections to the dorsal striatum, especially the dorsomedial  
72 subregion (DMS), are uniquely positioned to play a crucial role in active avoidance behavior given  
73 their importance in goal-directed behavior (Balleine & O'Doherty, 2010; Gremel & Costa, 2013;  
74 Hart, Bradfield, & Balleine, 2018; Hart, Bradfield, Fok, et al., 2018; Pitts et al., 2018) and

75 approach-avoidance decision making (Friedman et al., 2015; Loewke et al., 2021). Additionally in  
76 humans, the degree of coupling between the caudate (the human homologue of the DMS) and  
77 the medial prefrontal cortex (mPFC) positively correlates with successful active avoidance  
78 performance with greater coupling predicting better performance (Collins et al., 2014). The  
79 dmPFC-DMS projection could hold task-relevant information regarding action-outcome  
80 contingencies necessary for goal-directed behavior (Balleine & O'Doherty, 2010; Yin & Knowlton,  
81 2006). As the dmPFC-DMS projection directly interfaces with the striatum, this projection could  
82 also carry crucial information for avoidance initiation through movement-promoting pathways  
83 (Kravitz & Kreitzer, 2012; Redgrave et al., 2010). Despite promising initial evidence and strong  
84 rationale for its involvement, the dmPFC-DMS projection has remained completely unexplored in  
85 rodent models of active avoidance.

86 In this study, we utilize fiber photometry in combination with retrograde viral targeting strategies  
87 to examine the activity of the dmPFC and its projections to the DMS and the BLA during learning  
88 and expression in a cued active avoidance task. We identified task-relevant neural activity in  
89 response to CS onset as well as clinically relevant behaviors such as avoidance and freezing. We  
90 find that dmPFC and both of these downstream projections show learning-related increases in  
91 activity at CS onset. However, encoding by these projections diverges during avoidance onset,  
92 where we find increased activity in the dmPFC-DMS projection and decreased activity in the  
93 dmPFC-BLA projection. Finally, we identify decreases in dmPFC activity that correspond to  
94 freezing bouts. Overall, our results suggest that dmPFC and its projections to DMS and BLA  
95 contain task-relevant information and that the dmPFC-DMS and dmPFC-BLA may play distinct  
96 yet complementary roles in successful enactment of active avoidance behavior.

## RESULTS

### 97 **dmPFC shows learning related increases in activity at CS onset**

98 To record the endogenous activity of excitatory dmPFC neurons during avoidance learning, we  
99 utilized a virally-expressed calcium indicator (GCaMP) and fiber photometry to record changes in  
100 GCaMP fluorescence in the dmPFC, which acted as a proxy for changes in neural activity (**Figure**  
101 **1A, Supplemental Figure 1**). Mice were trained for five days on a cued two-way active avoidance  
102 behavioral paradigm (**Figure 1B**). A white light underneath the shock floor where the animal was  
103 present acted as a conditioned stimulus (CS) and signaled impending shock on that side of the  
104 two-chamber apparatus. Throughout training, animals learned to successfully avoid the  
105 impending shock by shuttling from the lit chamber to the unlit chamber during the CS-only period.  
106 Animals were trained until they successfully avoided the shock on 80% of all trials, which occurred  
107 by day 5 of training (**Figure 1C**). Average avoidance latency was between 4-6 seconds and  
108 decreased across training. Avoidance latencies also became more stereotyped as evidenced by  
109 a change in the shape of the avoidance latency distribution from a broad non-specific curve on  
110 day 1 to a narrower distribution on day 5 (**Figure 1D**). To uncover task-relevant neural activity in  
111 the dmPFC during active avoidance learning, we first examined heatmaps of the average change  
112 in calcium signal in the dmPFC for each trial during the CS-only period (first 10 seconds of the  
113 CS before the shock occurred) (**Figure 1E**). We saw a rapid peak in fluorescence at CS onset on  
114 day 1 that occurred on most but not all trials and became more consistent throughout training. In  
115 addition to this rapid CS response, we also observed a sustained increase in fluorescence across  
116 the 10 second CS-only period that appeared to develop across learning, as it was consistently  
117 present on days 3 and 5 but not day 1. While these heatmaps provided initial insight that there  
118 were task-relevant changes in the dmPFC during active avoidance learning, it was unclear  
119 whether these changes in calcium signal were a response to the CS itself and/or represented  
120 behaviors such as avoidance or freezing. In order to isolate CS onset responses, we created a

121 perievent time histogram (PETH) of z-scored changes in dmPFC calcium signal during the first  
122 second of the CS presentation as the majority of avoidance movements (>90%) occurred after  
123 this time window (**Figure 1F**). We found that the dmPFC showed a sharp increase in fluorescence  
124 during the first second of CS onset compared to the baseline period; this effect was significant on  
125 all training days. However, the magnitude of the increase in fluorescence significantly increased  
126 across days, with the smallest CS-related change in fluorescence occurring on day 1 and the  
127 largest CS-related change in fluorescence occurring on day 5 (**Figure 1G**, Two-way ANOVA,  
128 Training Day x Task Period  $p < 0.0001$ , Training Day  $p < 0.0001$ , Task Period  $p < 0.0001$ ; Sidak's  
129 Multiple Comparisons Test, Day 1 Baseline vs Day 3 Baseline  $p = 0.9949$ , Day 1 Baseline vs Day  
130 5 Baseline  $p = 0.9684$ , Day 1 Baseline vs Day 1 CS  $p < 0.0001$ , Day 1 CS vs Day 3 CS  $p <$   
131  $0.0001$ , Day 1 CS vs Day 5 CS  $p < 0.0001$ , Day 3 Baseline vs Day 5 Baseline  $p > 0.9999$ , Day 3  
132 Baseline vs Day 3 CS  $p < 0.0001$ , Day 3 CS vs Day 5 CS  $p < 0.0001$ , Day 5 Baseline vs Day 5  
133 CS  $p < 0.0001$ ;  $N = 10$  mice,  $n = 300$  trials). There were no significant within-day differences in  
134 the amplitude of the dmPFC calcium signal when comparing dmPFC fluorescence during the 15  
135 first trials to the last 15 trials within a given training day (**Supplemental Figure 2**). We also found  
136 no differences in calcium signal between successful and unsuccessful trials during the first second  
137 after CS onset; however, there were statistically significant differences during the later part of the  
138 PETH during the time window in which avoidance actions occur (**Supplemental Figure 3**). Taken  
139 together, these data suggest that there are learning-related increases in neural activity in the  
140 dmPFC during CS onset that become amplified across active avoidance learning.



## Kajs et al. Figure 1

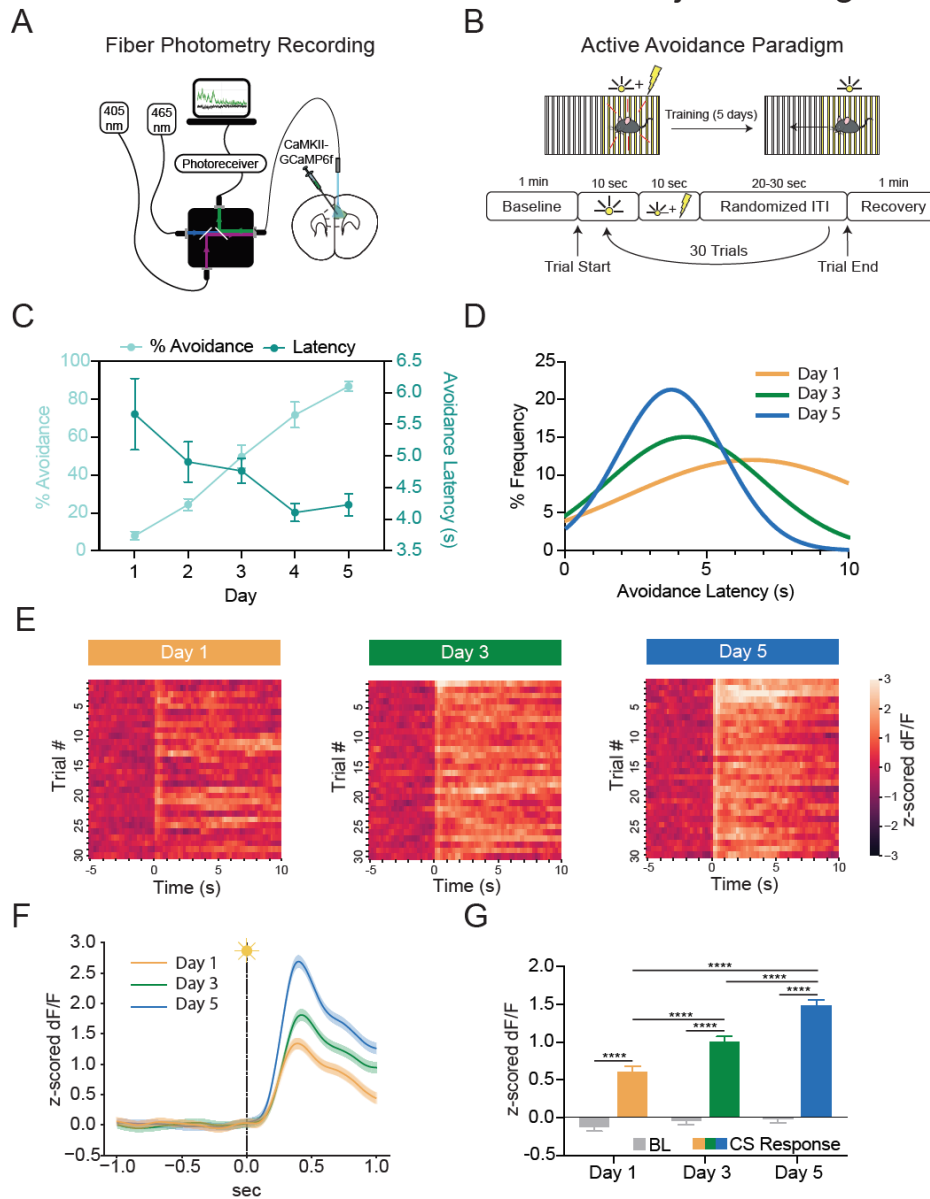

**Figure 1.** dmPFC shows learning-related increases in activity at CS onset during active avoidance learning. (A) Fiber photometry recording of dmPFC pyramidal neurons expressing GCaMP6f. (B) Behavioral schematic for active avoidance paradigm. (C) Average percent successful avoidance increased while avoidance latency decreased across training days. (D) Avoidance latency distribution shows avoidance latencies become shorter and more stereotyped across training. (E) Heatmaps of average change in calcium signal (z-scored dF/F) for each of the 30 trials presented in order from the first to the last trial for Day 1 (left), Day 3 (middle), and Day 5 (right). Heatmaps are aligned to CS onset (time zero) and show the total 10 second CS only period. dmPFC shows increased calcium signal at CS onset that becomes more consistent and sustained with training. (F) Perievent time histogram (PETH) showing increases in dmPFC calcium signal following CS onset. Orange line, mean  $\pm$  standard error of the mean (SEM) for Day 1; green line, mean  $\pm$  SEM for Day 3; blue line, mean  $\pm$  SEM for Day 5. (G) Quantification of CS onset PETH shows calcium signal is significantly higher during the CS period (0 to 1 s) compared to the baseline period (-1 to 0 s) for all days. \*\*\*\*  $p \leq 0.0001$ .

141 **dmPFC shows opposing patterns of activity during active avoidance and cued freezing**

142 We next sought to examine dmPFC neural activity that corresponded to active avoidance and  
143 freezing behaviors that occurred later during the CS presentation. We investigated freezing  
144 behavior in addition to avoidance as freezing represents an alternative coping strategy that  
145 animals utilize early in learning before active coping strategies such as avoidance have been  
146 learned. The number of successful avoidances significantly increased across learning (**Figure**  
147 **2A-B**, Repeated Measures One-way ANOVA  $p < 0.0001$ ; Sidak's Multiple Comparisons Test, Day  
148 1 vs Day 3  $p = 0.0002$ , Day 1 vs Day 5  $p < 0.0001$ , Day 3 vs Day 5  $p < 0.0001$ ;  $N = 10$  mice).  
149 When aligning the dmPFC calcium signal to avoidance onset on day 5 (**Figure 2C**), we found a  
150 statistically significant increase in fluorescence during the avoidance period compared to the  
151 baseline period (**Figure 2D**, Repeated Measures One-Way ANOVA  $p < 0.0001$ ; Tukey's Multiple  
152 Comparisons Test, Baseline vs Pre Avoid  $p < 0.0001$ , Baseline vs Avoid  $p < 0.0001$ , Baseline vs  
153 Post Avoid  $p < 0.0001$ , Pre Avoid vs Avoid  $p < 0.0001$ , Pre Avoid vs Post Avoid  $p = 0.6062$ , Avoid  
154 vs Post Avoid  $p < 0.0001$ ;  $N = 10$  mice,  $n = 253$  trials). To rule out the possibility that these neural  
155 activity changes during avoidance onset in the dmPFC could be purely movement-related, we  
156 compared calcium signal during non-avoidance movements in the intertrial interval (ITI) period to  
157 avoidance movements of a similar velocity or duration from the same recording day. We found  
158 significantly increased fluorescence during avoidance movements compared to ITI movements  
159 during the time period where movements are initiated, suggesting that the increase in calcium  
160 signal during avoidance movements was not purely movement-related (**Supplemental Figure 4**).  
161 To further characterize the nature of the neural activity changes during avoidance, we created  
162 heatmaps of calcium activity on all individual trials aligned to avoidance onset and sorted them  
163 from shortest to longest avoidance latency (**Figure 2E**). In this heatmap, we observed a consistent  
164 time-locked peak in fluorescence that corresponded to avoidance onset. We also saw a sharp  
165 moving peak of fluorescence curving leftward that likely represented the increase in calcium signal

166 at CS onset. These data suggest that the dmPFC separately encodes both the CS onset and  
167 avoidance onset through distinct increases in neural activity.

168 In contrast to avoidance, the amount of freezing during the CS-only period (cued freezing)  
169 significantly decreased across learning (**Figure 2F-G**, Repeated Measures One-way ANOVA  $p =$   
170  $0.0045$ ; Sidak's Multiple Comparisons Test, Day 1 vs Day 3  $p = 0.4807$ , Day 1 vs Day 5  $p =$   
171  $0.0024$ , Day 3 vs Day 5  $p = 0.023$ ;  $N = 10$  mice). When we generated a PETH of dmPFC calcium  
172 activity aligned to freezing onset on day 1 for all cued freezing bouts with a 1 second minimum  
173 duration (**Figure 2H**), we found a statistically significant decrease in fluorescence during the  
174 freezing period compared to the baseline period (**Figure 2I**, Paired t-test  $p < 0.0001$ ;  $N = 10$  mice,  
175  $n = 246$  trials). When examining a heatmap of calcium activity on all individual trials aligned to  
176 freezing onset and sorted by shortest to longest freezing bout duration, we saw a dip in  
177 fluorescence at freezing onset that increased in duration with longer freezing bouts (**Figure 2J**).  
178 This suggested that the duration of the decrease in dmPFC calcium activity during freezing  
179 corresponded to the duration of the freezing bout length, providing further evidence that the dip  
180 in fluorescence was tightly time-locked with freezing behavior. Overall, our results suggest that  
181 the dmPFC shows opposing patterns of activity during avoidance and freezing and that these  
182 patterns of activity are distinct from the neural activity observed during CS onset.

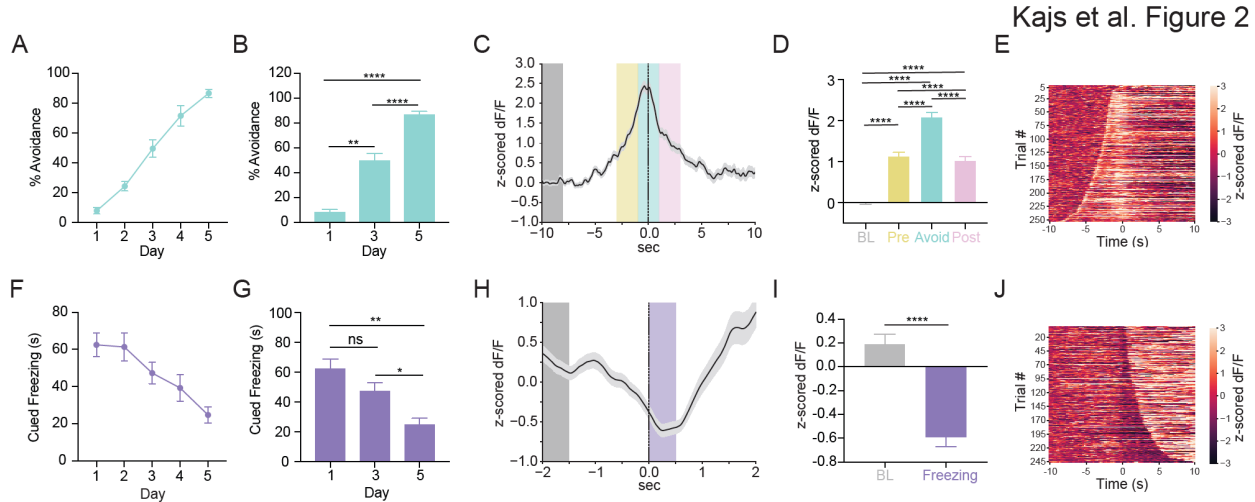

**Figure 2.** dmPFC shows opposing patterns of activity during active avoidance and cued freezing behavior. (A) Percent successful avoidance across training days. (B) Quantification of percent successful avoidance shows animals significantly increase avoidance across training. (C) PETH shows an increase in calcium signal at avoidance onset. Line with shading represents mean  $\pm$  SEM. Grey box, baseline period (BL); yellow box, pre avoidance period (Pre); teal box, avoidance period (Avoid); pink box, post avoidance period (Post). (D) Quantification of avoidance PETH reveals significantly increased calcium signal in pre avoid (-3 to -1 s), avoid (-1 to 1 s), and post avoid (1 to 3 s) periods compared to the baseline period (-10 to -8 s). (E) Heatmap of change in calcium signal for individual avoidance trials aligned to avoidance onset and sorted from shortest to longest avoidance latency. Heatmap shows distinct increases in calcium signal at CS onset (slope curving leftward) and avoidance onset (time zero). (F) Percent freezing during the CS only period (cued freezing) across training days. (G) Quantification of percent cued freezing shows that animals significantly decrease cued freezing across training. (H) PETH shows decrease in calcium signal at freezing onset. Line with shading represents mean  $\pm$  SEM. Grey box, baseline period (BL); Purple box, freezing period (Freezing). (I) Quantification of freezing PETH shows significant decrease in calcium signal during the freezing period (0-0.5 s) compared to the baseline period (-2 to -1.5 s). (J) Heatmap of change in calcium signal during individual freezing bouts aligned to freezing onset and sorted from shortest to longest freezing bout. Heatmap shows dips in calcium signal at freezing onset that increases in length as freezing bout duration increases. ns = not significant, \*  $p \leq 0.05$ , \*\*  $p \leq 0.01$ , \*\*\*\*  $p \leq 0.0001$ .

183 **dmPFC-DMS and dmPFC-BLA projections show learning-related increases in activity at**  
184 **CS onset**

185 We also explored how subpopulations of dmPFC neurons defined by their downstream projection  
186 target may diverge in the encoding of active avoidance. To obtain projection-specific fiber  
187 photometry recordings from the dmPFC-DMS projection, we used a dual virus retrograde  
188 targeting strategy to express GCaMP only in dmPFC neurons projecting to the DMS (**Figure 3A,**  
189 **Supplemental Figure 5**). Behavioral results from this cohort revealed that the mice learned to  
190 80% successful avoidance by day 5, average avoidance latencies were between 4-6 seconds,  
191 and avoidance latency decreased across training (**Figure 3B**). To visualize potential task-relevant  
192 information within the dmPFC-DMS projection, we examined heatmaps of the average calcium  
193 signal change on each trial for the first 10 seconds of the CS (CS-only period) (**Figure 3C**). In the  
194 dmPFC-DMS projection, already on the first day of learning we saw a sustained increase in  
195 fluorescence during the CS only period, although the start of the signal did not appear clearly time  
196 locked to CS onset and the sustained increase did not appear on every trial. However, by day 5  
197 of learning the sustained increase in fluorescence in the dmPFC-DMS projection became time  
198 locked to CS onset and consistently appeared on every trial. When examining calcium activity  
199 during the first second of CS onset in the dmPFC-DMS projection (**Figure 3D**), we found a  
200 significant increase in signal at CS onset compared to baseline on day 5 but not on day 1. We  
201 additionally found that there was a significant difference in calcium signal at CS onset across  
202 days, with a larger CS-evoked increase in signal on day 5 compared to day 1, suggesting that  
203 there were learning-related changes (**Figure 3E**, Two-way ANOVA, Training Day x Task Period  
204  $p = 0.0498$ , Training Day  $p = 0.0725$ , Task Period  $p < 0.0001$ ; Sidak's Multiple Comparisons Test,  
205 Day 1 Baseline vs Day 1 CS  $p = 0.0634$ , Day 1 Baseline vs Day 5 Baseline  $p > 0.9999$ , Day 1 CS  
206 vs Day 5 CS  $p = 0.0466$ , Day 5 Baseline vs Day 5 CS  $p < 0.0001$ ;  $N = 8$  mice,  $n = 300$  trials).

207 We next examined neural activity in the dmPFC-BLA projection during active avoidance learning  
208 using the same dual virus retrograde targeting strategy (**Figure 3F, Supplemental Figure 5**).  
209 Behaviorally, we saw similar trends to the dmPFC-DMS projection cohort (**Figure 3G**). Heatmaps  
210 of the average calcium activity change during the first 10 seconds of the CS revealed that the  
211 dmPFC-BLA projection did not show clearly organized patterns of fluorescence on the first day of  
212 learning. However, by day 5 this projection showed a clear transient increase in fluorescence that  
213 was time locked to CS onset and consistently seen across trials (**Figure 3H**). When examining  
214 calcium activity in the dmPFC-BLA during the first second of CS onset across learning (**Figure**  
215 **3I**), the dmPFC-BLA projection showed no significant differences in signal between the baseline  
216 period and CS onset on day 1, but showed significant increases in calcium signal at CS onset  
217 compared to the baseline period on day 5. We also found that there was a significant increase in  
218 signal at CS onset on day 5 of learning compared to day 1 of learning (**Figure 3J**, Two-way  
219 ANOVA, Training Day x Task Period  $p = 0.0816$ , Training Day  $p = 0.0411$ , Task Period  $p < 0.0001$ ;  
220 Sidak's Multiple Comparisons Test, Day 1 Baseline vs Day 5 Baseline  $p > 0.9999$ , Day 1 Baseline  
221 vs Day 1 CS  $p = 0.3023$ , Day 1 CS vs Day 5 CS  $p = 0.0442$ , Day 5 Baseline vs Day 5 CS  $p <$   
222  $0.0001$ ;  $N = 9$  mice,  $n = 300$  trials). Additional analyses examining calcium activity in these  
223 projections during successful and unsuccessful trials found that the CS-evoked fluorescence  
224 changes during successful trials did not significantly differ from that on unsuccessful trials for  
225 either projection (**Supplemental Figure 6**). Overall, our results suggest that both the dmPFC-  
226 DMS and dmPFC-BLA projections show learning-related increases in neural activity at CS onset  
227 during active avoidance learning.

Kajs et al. Figure 3

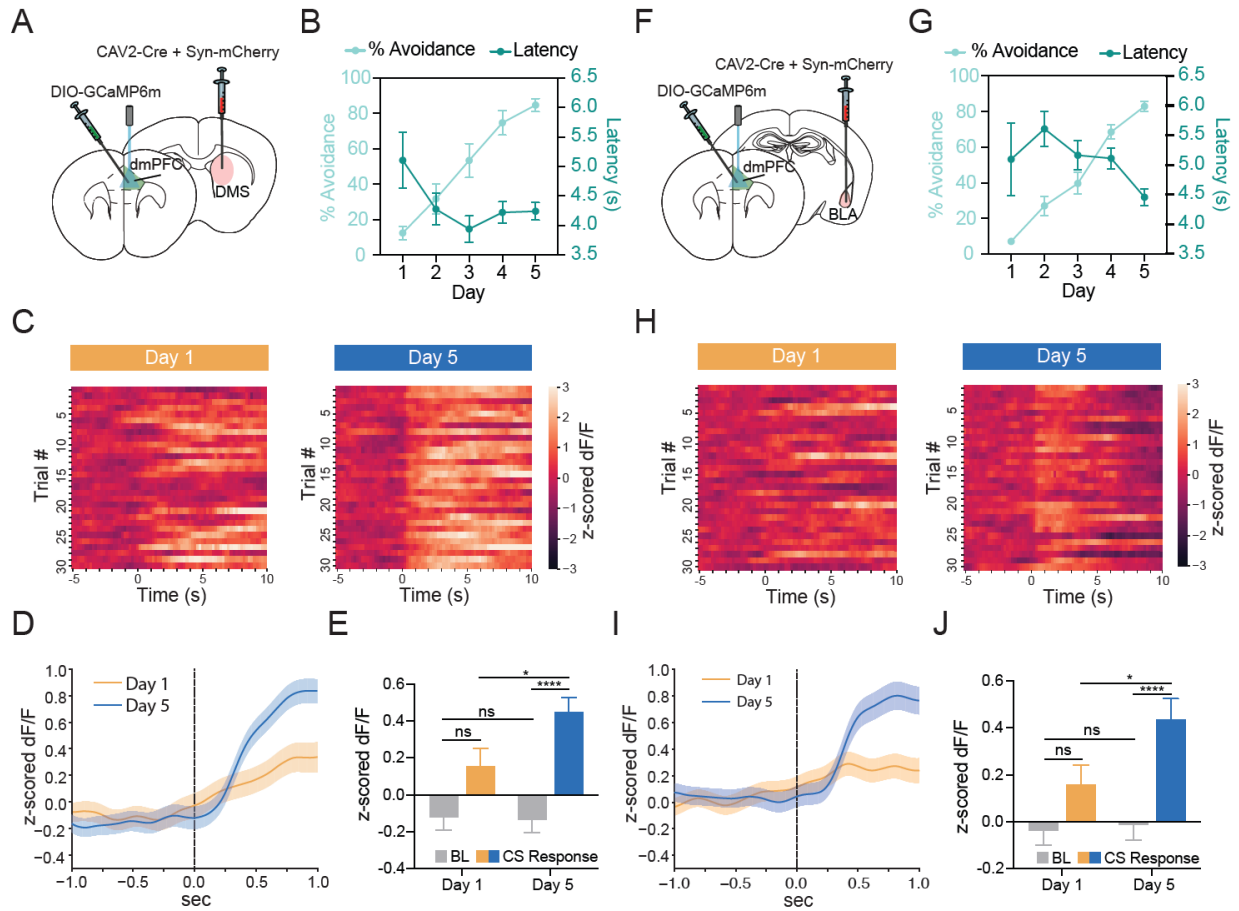

**Figure 3.** dmPFC-DMS and dmPFC-BLA show similar learning-related increases in activity at CS onset during active avoidance learning. (A) Viral targeting strategy for dmPFC-DMS photometry. (B) Percent avoidance increases while avoidance latency decreases across training in the dmPFC-DMS cohort. (C) Heatmaps of change in calcium signal aligned to CS onset for each of the 30 trials arranged from first to the last trial for Day 1 (left) and Day 5 (right). dmPFC-DMS projection shows sustained increases in calcium signal at CS onset that become more consistent across training. (D) PETH shows increases in signal at CS onset in the dmPFC-DMS projection following training. orange line, mean  $\pm$  SEM for Day 1; blue line, mean  $\pm$  SEM for Day 5. (E) Quantification of the dmPFC-DMS CS onset PETH shows significant increase in calcium signal during the CS period (0 to 1 s) compared to the baseline period (-1 to 0 s) for Day 5, but not Day 1. (F) Viral targeting strategy for dmPFC-BLA photometry. (G) Percent avoidance increases while avoidance latency decreases across training in the dmPFC-BLA cohort. (H) Heatmaps of change in calcium signal aligned to CS onset for each of the 30 trials arranged from first to the last trial for Day 1 (left) and Day 5 (right). dmPFC-BLA projection shows transient increases in calcium signal at CS onset only during later stages of training. (I) PETH shows increases in signal at CS onset in the dmPFC-BLA projection following training. orange line, mean  $\pm$  SEM for Day 1; blue line, mean  $\pm$  SEM for Day 5. (J) Quantification of the dmPFC-BLA CS onset PETH shows significant increase in calcium signal during the CS period (0 to 1 s) compared to the baseline period (-1 to 0 s) for Day 5, but not Day 1. ns = not significant, \*  $p \leq 0.05$ , \*\*\*\*  $p \leq 0.0001$ .

228 **dmPFC-DMS and dmPFC-BLA projections show divergent encoding of active avoidance**  
229 **behavior**

230 We were additionally interested in examining projection-specific neural activity during avoidance  
231 and freezing behaviors. Both cohorts reached 80% successful avoidance by day 5 of learning  
232 (**Figure 4A-C**, dmPFC-DMS Paired t-test  $p < 0.0001$ , dmPFC-BLA Paired t-test  $p < 0.0001$ ;  
233 dmPFC-DMS  $N = 8$  mice, dmPFC-BLA  $N = 9$  mice). While calcium activity in these two projections  
234 was similar upon CS onset, we found a striking contrast in avoidance-related calcium activity  
235 between the dmPFC-DMS and dmPFC-BLA projections. In the PETH aligned to avoidance onset,  
236 while the dmPFC-DMS projection showed a hill-like increase in fluorescence at avoidance onset,  
237 the dmPFC-BLA projection showed a descending slope (**Figure 4D**). Validating these stark  
238 changes, the dmPFC-DMS projection showed a significant increase in signal during the  
239 avoidance period compared to the baseline period while the dmPFC-BLA projection showed a  
240 significant decrease in signal between the pre-avoidance and post avoidance periods. In addition,  
241 the dmPFC-DMS and the dmPFC-BLA calcium signals were distinct from each other as they  
242 statistically differed throughout the avoidance and post-avoidance periods (**Figure 4E**, Two-way  
243 ANOVA, Task Period x Projection  $p < 0.0001$ , Task Period  $p < 0.0001$ , Projection  $p < 0.0001$ ;  
244 Sidak's Multiple Comparisons Test, dmPFC-DMS Baseline vs dmPFC-DMS Avoid  $p < 0.0001$ ,  
245 dmPFC-BLA Pre Avoid vs dmPFC-BLA Post Avoid  $p < 0.0001$ , dmPFC-DMS Baseline vs dmPFC-  
246 BLA Baseline  $p > 0.9999$ , dmPFC-DMS Pre Avoid vs dmPFC-BLA Pre Avoid  $p = 0.9837$ , dmPFC-  
247 DMS Avoid vs dmPFC-BLA Avoid  $p < 0.0001$ , dmPFC-DMS Post Avoid vs dmPFC-BLA Post  
248 Avoid  $p < 0.0001$ ; dmPFC-DMS  $N = 8$  mice,  $n = 195$  trials, dmPFC-BLA  $N = 9$  mice,  $n = 211$   
249 trials). Using movements of similar velocity or duration during the ITI period as a control, we found  
250 significant differences in fluorescence between the ITI movements compared to avoidance  
251 movements, suggesting that the changes in calcium activity in these projections during avoidance  
252 onset were not purely movement-related (**Supplemental Figure 7**). To further characterize the  
253 avoidance-related activity seen in these projections, we created heatmaps of calcium activity on



254 all individual trials aligned to avoidance onset sorted from shortest to longest avoidance latency  
255 for each projection (**Figure 4F**). In the dmPFC-DMS projection avoidance heatmap, we saw an  
256 increase in fluorescence that curved leftwards, which corresponded to the start of the CS. This  
257 increased fluorescence that occurred at CS onset was sustained through avoidance onset as  
258 there were no clear distinctions in signal between when the CS began and when the avoidance  
259 began. In contrast, in the dmPFC-BLA projection heatmap, CS onset and avoidance onset were  
260 marked by distinct changes in calcium activity. There was a clear increase in fluorescence sloping  
261 leftward that corresponded to CS onset, whereas avoidance onset was marked by a time-locked  
262 drop in fluorescence.

263 We next examined how the dmPFC-DMS and the dmPFC-BLA projections encoded freezing  
264 behavior and found statistically significant decreases in freezing on day 5 compared to day 1 for  
265 each projection (**Figure 4G-I**, dmPFC-DMS Paired t-test  $p = 0.0484$ , dmPFC-BLA Paired t-test  $p$   
266  $= 0.0032$ ; dmPFC-DMS  $N = 8$  mice, dmPFC-BLA  $N = 9$  mice). However, there was no significant  
267 difference in signal between the baseline period and the freezing period in the perievent time  
268 histograms aligned to freezing onset for each projection (**Figure 4J-K**, Two-way ANOVA, Task  
269 Period x Projection  $p = 0.9234$ , Task Period  $p = 0.8965$ , Projection  $p = 0.0145$ ; Sidak's Multiple  
270 Comparisons Test, dmPFC-DMS Baseline vs dmPFC-BLA Baseline  $p = 0.4562$ , dmPFC-DMS  
271 Baseline vs dmPFC-DMS Freezing  $p > 0.9999$ , dmPFC-BLA Baseline vs dmPFC-BLA Freezing  
272  $p > 0.9999$ , dmPFC-DMS Freezing vs dmPFC-BLA Freezing  $0.3624$ ; dmPFC-DMS  $N = 8$  mice,  $n$   
273  $= 183$  trials, dmPFC-BLA  $N = 9$  mice,  $n = 229$  trials). Overall, our results show opposing patterns  
274 of activity in the dmPFC-DMS and dmPFC-BLA projection during active avoidance behavior, with  
275 increased activity in the dmPFC-DMS projection and decreased activity in the dmPFC-BLA  
276 projection at avoidance onset. The main findings from our study are summarized in **Figure 4L**.

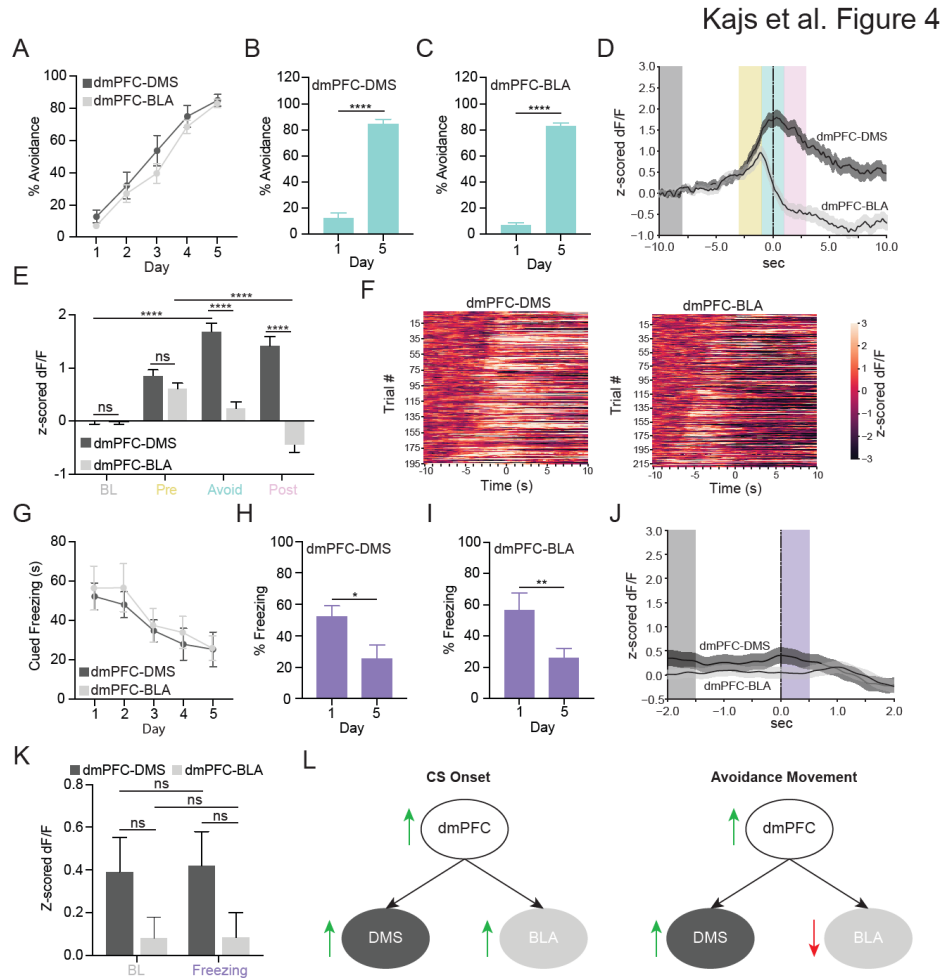

**Figure 4.** dmPFC-DMS and dmPFC-BLA show divergent encoding of active avoidance behavior. (A) Percent avoidance across training days in the dmPFC-DMS (dark grey line) and dmPFC-BLA (light grey line) cohort. (B-C) Percent avoidance significantly increases from Day 1 to Day 5 in the dmPFC-DMS (left) and dmPFC-BLA (right) cohort. (D) PETH shows increase in calcium signal in the dmPFC-DMS projection and decrease in calcium signal in the dmPFC-BLA projection during avoidance onset. Dark grey line, mean  $\pm$  SEM for dmPFC-DMS projection; light grey line, mean  $\pm$  SEM for dmPFC-BLA projection; Grey box, baseline period (BL); yellow box, pre avoidance period (Pre); teal box, avoidance period (Avoid); pink box, post avoidance period (Post). (E) Quantification of avoidance PETH shows a significant increase in calcium signal in the avoid (-1 to 1 s) period compared to baseline period (-10 to -8 s) for dmPFC-DMS projection and a significance decrease in signal during the post avoid (1 to 3 s) period compared to the pre avoid (-3 to -1 s) period in the dmPFC-BLA projection. (F) Heatmap of change in calcium signal for individual avoidance trials aligned to avoidance onset and sorted from shortest to longest avoidance latency for the dmPFC-DMS (left) and dmPFC-BLA (right) projections. (G) Percent cued freezing in the dmPFC-DMS (dark grey line) and the dmPFC-BLA (light grey line) cohort. (H-I) Percent cued freezing significantly decreases from Day 1 to Day 5 in the dmPFC-DMS (left) and the dmPFC-BLA (right) cohorts. (J) PETH shows no change in calcium signal at freezing onset for either the dmPFC-DMS or the dmPFC-BLA projection. Dark grey line, mean  $\pm$  SEM for dmPFC-DMS projection; light grey line, mean  $\pm$  SEM for dmPFC-BLA projection; Grey box, baseline period (BL); Purple box, freezing period (Freezing). (K) Quantification of freezing PETH shows no significant change in calcium signal during the freezing period (0-0.5 s) compared to the baseline period (-2 to -1.5 s). (L) Graphical abstract summarizing main findings from the study. ns = not significant \*  $p \leq 0.05$ , \*\*  $p \leq 0.01$ , \*\*\*\*  $p \leq 0.0001$ .

## DISCUSSION

277 We found that the dmPFC and its projections to the DMS and the BLA contain learning-related  
278 increases in activity at CS onset during active avoidance. Encoding of active avoidance diverged  
279 in the dmPFC-DMS and dmPFC-BLA projections, which showed increased and decreased neural  
280 activity at avoidance onset, respectively. To our knowledge, this is the first study to record the  
281 endogenous activity of distinct dmPFC projections during active avoidance behavior. Our results  
282 reveal the importance of studying projection-defined dmPFC subpopulations as they may play  
283 distinct but complementary roles in active avoidance learning and expression.

284 The sharp peak of dmPFC activity at CS onset that significantly increased in amplitude across  
285 training suggests that the dmPFC encodes learning-related information for active avoidance  
286 behavior. Given that significant differences in neural activity were seen across days but not within  
287 days suggests that the learning-related increase in activity at CS onset in the dmPFC is a  
288 consolidated phenomenon that gradually builds across time. Another recent study used dmPFC  
289 single unit activity to successfully decode CS identity between a CS that predicted shock and led  
290 to avoidance (CS+) and a control CS that did not predict shock and did not lead to avoidance  
291 (CS-) (Jercog et al., 2021), corroborating our finding that the dmPFC holds active avoidance task-  
292 relevant information. While our results show increased dmPFC activity aligned with CS onset,  
293 another study in rats using a platform-mediated active avoidance task found inhibition of single  
294 dmPFC units upon CS onset unique to avoidance (Diehl et al., 2018). This discrepancy could be  
295 explained by the subregion of dmPFC targeted (rostral vs caudal), or technical differences  
296 between bulk calcium recording and single unit electrophysiology. For example, calcium  
297 indicators are more sensitive to increases rather than decreases in activity and may preferentially  
298 reflect synchronous and/or bursting activity of groups of neurons (Chen et al., 2013). Interestingly,

299 there was no difference in this CS-evoked neural signal between successful and unsuccessful  
300 trials. This observation is supported by other studies (Diehl et al., 2018; Jercog et al., 2021) and  
301 suggests that this activity may signal the option to avoid rather than the avoidance behavior itself.  
302 Of note, the initial sharp peak of activity upon CS onset was present on the first day before  
303 learning had occurred, albeit significantly smaller in amplitude than on the last day of training.  
304 Given that the dmPFC receives various sensory related inputs (Åhrlund-Richter et al., 2019), this  
305 initial peak on day 1 may represent sensory features of the CS, while the increase in amplitude  
306 of this peak across days is reflective of learning-related activity. Overall, this is the first study to  
307 our knowledge to examine longitudinal learning-related changes in dmPFC activity across days  
308 of an active avoidance task.

309 The dmPFC also showed a robust increase in neural activity during avoidance onset in our task.  
310 This result is consistent with a recent study employing the platform-mediated avoidance task,  
311 which also found increased activity in the dmPFC when animals moved onto a platform to avoid  
312 shock. However, there was no difference in the proportion of cells excited between mice trained  
313 on fear conditioning or active avoidance in the same apparatus (Diehl et al., 2018), suggesting  
314 that increased activity was not specific to avoidance behavior in their task. While their study  
315 controlled for locomotion by comparing platform entries between separate avoidance-trained and  
316 fear-conditioned cohorts, here we performed a within-animal locomotor control. Comparing  
317 dmPFC neural activity during avoidance movements versus intertrial interval movements of  
318 similar duration and velocity, we found that the increased neural activity seen during avoidance  
319 is not accounted for by general movement alone. This finding is corroborated by another study  
320 using dmPFC activity to decode avoidance behavior in a discriminative two-way active avoidance  
321 task, which found an increase in decoding accuracy within the last second before the avoidance  
322 movement which could not be accounted for by speed (Jercog et al., 2021). The predictive  
323 increase in decoder accuracy before avoidance initiation is also in alignment with the increase in

324 activity we observed in the dmPFC preceding avoidance onset. Furthermore, only the excitatory  
325 responses in the dmPFC contained predictive information about avoidance initiation in the  
326 discriminative two-way active avoidance task (Jercog et al., 2021), which further supports that  
327 notion that the excitatory dmPFC activity we see in our task contains crucial information for proper  
328 avoidance performance rather than only encoding movement. We also found differences in  
329 dmPFC activity between successful and unsuccessful trials during the period where avoidances  
330 normally occur, which has been similarly identified in other studies and may correspond to  
331 differences in the behavioral repertoire of the animals during successful and unsuccessful trials  
332 (Diehl et al., 2018; Jercog et al., 2021).

333 We propose that the increased dmPFC activity at avoidance onset may be important for the  
334 animal to take action in the face of an anxiogenic stimulus. In the active avoidance task, when the  
335 CS light is on, dmPFC activity increases when the animal initiates an avoidance movement within  
336 the anxiogenic lit chamber of the apparatus. A recent study from our laboratory using the elevated  
337 zero maze to assess approach-avoidance conflict showed that dmPFC activity increases as the  
338 animal moves into the anxiogenic open arms of the maze (Loewke et al., 2021). These seemingly  
339 disparate findings may be reconciled by the idea that dmPFC activity allows the animal to explore  
340 or take action in the face of an anxiogenic stimulus, while dmPFC activity decreases once the  
341 anxiogenic stimulus has been successfully avoided (i.e., shuttling to the safe chamber in active  
342 avoidance, and entering the closed arm of the elevated zero maze). The notion that dmPFC  
343 activity may be important for resolving conflicting signals between the drive to explore or take  
344 action and the drive to passively cope with an anxiogenic stimulus is supported by various studies  
345 suggesting a role for the dmPFC in decision making under conflict (Burgos-Robles et al., 2017;  
346 Friedman et al., 2015; Ishikawa et al., 2020; Loewke et al., 2021).

347 The dmPFC as a whole showed decreased activity during freezing in our active avoidance task,  
348 with the duration of this decrease in activity corresponding to the freezing bout length. In contrast,  
349 in vivo electrophysiology studies have found increased firing rates in dmPFC neurons during  
350 freezing behavior in classical and discriminative fear conditioning tasks (Burgos-Robles et al.,  
351 2009; Dejean et al., 2016; Likhtik et al., 2014). Given that calcium indicators are more sensitive  
352 to increases rather than decreases in activity (Chen et al., 2013), this difference seems likely  
353 unrelated to technique used and may instead be due to key differences in the tasks, such as the  
354 fact that the active avoidance task allows for both passive and active coping responses to threat,  
355 whereas in classical fear conditioning animals have no control over the shocks and therefore are  
356 biased toward passive coping via freezing. Future studies using single cell resolution calcium  
357 imaging will help elucidate the encoding of individual dmPFC neurons during freezing in active  
358 avoidance versus fear conditioning tasks.

359 Both the dmPFC-DMS and dmPFC-BLA projections showed increased activity at CS onset, with  
360 learning-related changes evidenced by significant increases in signal amplitude across training in  
361 both projections. As the dmPFC-DMS projection plays an important role in goal-directed behavior  
362 (Hart, Bradfield, & Balleine, 2018; Hart, Bradfield, Fok, et al., 2018), this CS-related activity could  
363 hold crucial information regarding action-outcome contingencies for this task. The dmPFC-BLA  
364 projection has been linked to associative fear conditioning (Adhikari et al., 2015; Cho et al., 2013)  
365 and thus CS-related activity in this projection may contain key information on CS-US associations  
366 in this task. When comparing successful and unsuccessful trials, we found no differences in  
367 activity during CS onset in either projection, suggesting that CS-related activity in these  
368 projections may again signal an avoidance option rather than avoidance behavior itself.  
369 Interestingly, downstream BLA neurons do show distinct activity on successful and unsuccessful  
370 avoidance trials (Kyriazi et al., 2018). Thus, the BLA likely receives information necessary for  
371 distinguishing between these trial types from a region outside the dmPFC. Future studies should

372 attempt to uncover additional circuits that differentiate between successful and unsuccessful trials  
373 that may act upstream of the BLA.

374 While CS-aligned activity looked similar in both projections, they displayed opposing patterns of  
375 activity at avoidance onset, with the dmPFC-DMS projection showing increased activity and the  
376 dmPFC-BLA projection showing decreased activity. The dmPFC-DMS projection directly  
377 interfaces downstream with the striatum which regulates motor control and action selection  
378 (Kravitz & Kreitzer, 2012) and is therefore poised to play a privileged role in aiding avoidance  
379 movement initiation. The striatum consists of D1 and D2 medium spiny neurons (MSNs) that,  
380 when optogenetically stimulated, drive motor initiation and motor cessation, respectively (Kravitz  
381 & Kreitzer, 2012; Redgrave et al., 2010). The mPFC has stronger synaptic input to D1 versus D2  
382 MSNs, and optogenetic stimulation of D1 MSNs recapitulates anxiolytic effects seen with dmPFC-  
383 DMS stimulation (Loewke et al., 2021). Increased activity in the dmPFC-DMS projection may  
384 directly excite striatal D1 MSNs leading to motor initiation and, in our task, active avoidance  
385 behavior. Conversely, the dmPFC-BLA projection has been tied to freezing behavior, with  
386 dmPFC-BLA stimulation during fear conditioning leading to increased freezing at extinction recall  
387 (Adhikari et al., 2015). Fear-related information is thought to be sent from the BLA to the central  
388 amygdala (CeA) to downstream brainstem structures leading to freezing initiation (Tovote et al.,  
389 2015). Given that increased activity in the dmPFC-BLA-CeA pathway may promote freezing, the  
390 decreased activity we see in the dmPFC-BLA projection during avoidance behavior may help  
391 suppress freezing to allow proper active avoidance behavior to occur. The contrasting neural  
392 activity in the dmPFC-DMS and dmPFC-BLA projections may therefore play distinct yet  
393 complementary roles in coordinating successful active avoidance behavior through the initiation  
394 of avoidance movements (dmPFC-DMS) and the suppression of freezing behavior (dmPFC-BLA).

395 While the dmPFC-DMS projection has not been previously explored within the context of active  
396 avoidance, a recent optogenetic study has causally implicated the dmPFC-BLA projection in  
397 platform-mediated active avoidance (Diehl et al., 2020). Stimulation of the dmPFC-BLA projection  
398 increases avoidance in the platform-mediated task (Diehl et al., 2020), while our photometry  
399 results would suggest that inhibiting the dmPFC-BLA projection may increase avoidance given  
400 that dmPFC-BLA activity decreases acutely during avoidance in our task. In our previous study  
401 examining the dmPFC-DMS and dmPFC-BLA projections during an innate approach-avoidance  
402 task, we found that the dmPFC-DMS projection recapitulated whole population dmPFC activity  
403 while the dmPFC-BLA projection did not (Loewke et al., 2021). Similarly, here we find that the  
404 dmPFC-DMS projection shows increased activity during avoidance similar to the dmPFC overall,  
405 while the dmPFC-BLA projection shows distinct decreases in activity during avoidance. The  
406 projection-specific activity we observed during avoidance intriguingly parallels fMRI findings  
407 during active avoidance in humans (Collins et al., 2014; Delgado et al., 2009). In one study,  
408 coupling between the mPFC and the caudate (the human equivalent of the DMS) and between  
409 the mPFC and the amygdala during active avoidance trials predicted better active avoidance  
410 performance (Collins et al., 2014). The increased coupling between mPFC and caudate/amygdala  
411 during active avoidance performance parallels the signals we see in the dmPFC-DMS and  
412 dmPFC-BLA projections during active avoidance behavior. The human study also found  
413 increased activity in the caudate and decreased activity in the amygdala during active avoidance  
414 behavior (Collins et al., 2014), similar to the increased activity in the dmPFC-DMS projection and  
415 the decreased activity in the dmPFC-BLA projection we observed during active avoidance.  
416 Overall, these results highlight the importance of the mPFC downstream communication with both  
417 the dorsal striatum and the amygdala and suggest conservation of function across species in  
418 these circuits during active avoidance behavior.



419 Overall, we find task-relevant information encoding in the dmPFC and its projections to the DMS  
420 and the BLA during active avoidance learning, with opposing patterns of activity in the dmPFC-  
421 DMS and dmPFC-BLA projections during active avoidance behavior, suggesting that these  
422 circuits play distinct but complementary roles in the successful enactment of active avoidance  
423 behavior. These findings provide a crucial first step in identifying precise prefrontal subpopulations  
424 and circuits for active avoidance behavior that may help guide future treatment targets to alleviate  
425 avoidance symptoms seen in anxiety disorders.

## MATERIALS AND METHODS

### 426 **Animals**

427 We used wild-type C57BL6/J mice purchased from Jackson Laboratories. Animals were raised in  
428 normal light conditions (12:12 light/dark cycle) and given food and water ad libitum. All  
429 experiments were conducted in accordance with procedures established by the Institutional  
430 Animal Care and Use Committee at the University of California, San Francisco.

### 431 **Stereotaxic Surgery, Viral Injections, and Fiber Optic Cannula Implantation**

432 Surgeries were performed at 10-14 weeks of age. Mice were anesthetized using 5.0% isoflurane  
433 at an oxygen flow rate of 1 L/min and placed on top of a heating pad in a stereotaxic apparatus  
434 (Kopf Instruments, Tujunga, CA, USA). Anesthesia was maintained with 1.5-2.0% isoflurane for  
435 the duration of the surgery. Respiration and toe pinch response were monitored closely. Slow-  
436 release buprenorphine (0.5 mg/kg) and ketoprophen (1.6 mg/kg) were administered  
437 subcutaneously at the start of surgery. The incision area was shaved and cleaned with ethanol  
438 and betadine. Lidocane (0.5%) was administered topically on the scalp. An incision was made  
439 along the midline and bregma was measured. Virus was injected (as described below) using a 10  
440  $\mu$ L nanofil syringe (World Precision Instruments, Sarasota, FL, USA) with a 33-gauge beveled

441 needle. We used an injection rate of 100 nL/min with a 10-minute delay before retracting the  
442 needle. Mice recovered in a clean cage on top of a heating pad and a subsequent injection of  
443 ketoprofen (1.6 mg/kg) was given the following day.

444 For fiber photometry, we injected 500 nL of AAV5-CaMKII-GCaMP6f or AAV5-CaMKII-eYFP into  
445 the dmPFC to record pyramidal neuron activity; to record dmPFC-DMS and dmPFC-BLA  
446 projection neurons, we injected 1500 nL of AAV1-Syn-Flex-GCaMP6m or AAV5-EF1a-DIO-eYFP  
447 into the dmPFC and 500 nL of CAV2-Cre and hSyn-mCherry into the DMS and BLA. Injection  
448 coordinates (in millimeters relative to bregma) were as follows: dmPFC (1.8 A/P, -.35 M/L, -2.4  
449 D/V), DMS (.8 A/P, -1.5 M/L, -3.5 D/V), BLA (-1.4 A/P, -3.3 M/L, -4.9 D/V). For all fiber photometry  
450 experiments, we implanted a 2.5 mm metal fiber optic cannula with 400  $\mu$ m fiber optic stub (Doric  
451 Lenses, Quebec, Canada) in the dmPFC and waited 4-5 weeks for viral expression. Implant  
452 coordinates for the mPFC were 1.8 A/P, -.35 M/L, -2.2 D/V.

453 All viruses were obtained from Addgene, UNC Vector Core, or Institut de Génétique Moléculaire  
454 de Montpellier, Montpellier, France.

### 455 **Active Avoidance Behavior**

456 Mice underwent a two-way active avoidance procedure adapted from Pare 2018. Active  
457 avoidance training occurred in a custom made apparatus consisting of two shock floors with strips  
458 of visible spectrum LED lights underneath each shock floor. Both shock and light presentations  
459 were controlled by an arduino using custom-made arduino code (Arduino, Somerville, MA, USA)  
460 in conjunction with location data from video recording software, Ethovision XT (Noldus,  
461 Wageningen, Netherlands). All trials were conducted in the dark and infrared lights beneath each  
462 shock floor were used to track the animals. Mice underwent 30 active avoidance trials per day for  
463 5 days. Each active avoidance trial consisted of a 10 second light cue followed by 10 seconds of

464 light plus 0.3 mA shock. Light and shock were presented on the shock floor the mouse was  
465 currently on at the initiation of the trial. Mice were able to avoid the shock altogether by moving  
466 onto the other unlit shock floor during the 10 second light only period. This was considered a  
467 successful active avoidance trial. Trials in which the mouse failed to move to the other unlit shock  
468 floor during the 10 seconds of light only are considered unsuccessful trials. Training continued  
469 until the group average was at or above 80% successful avoidance (24 out of 30 trials). Location  
470 of the mice was recorded and quantified using Ethovision XT software.

### 471 **Fiber Photometry Recording**

472 *In vivo* calcium data were acquired using a custom-built rig based on a previously described setup  
473 (Lerner et al., 2015). This setup was controlled by an RZ5P fiber photometry processor (TDT,  
474 Alachua, FL, USA) and Synapse software (TDT). The RZ5P/Synapse software controlled a 4  
475 channel LED Driver (DC4100, Thorlabs, Newton, NJ, USA) which in turn controlled two fiber-  
476 coupled LEDs: 470 nm for GCaMP stimulation and 405 nm to control for artifactual fluorescence  
477 (M470F3, M405FP1, Thorlabs). These LEDs were sinusoidally modulated at 210 Hz (470 nm)  
478 and 320 Hz (405 nm) and connected to a Fluorescence Mini Cube with 4 ports (Doric Lenses)  
479 and the combined LEF output was connected through a fiber optic patch cord (0.48 NA, 400  $\mu$ m,  
480 Doric Lenses) to the cannula via a ceramic sleeve (Thorlabs). The emitted light was focused onto  
481 a Visible Femtowatt Photoreceiver Module (Model 2151, Newport, AC low) and sampled at 60  
482 Hz. Video tracking software (Ethovision, Noldus) was synchronized to the photometry setup using  
483 TTL pulses generated every 10 seconds following the start of the Noldus trial. Raw photoreceiver  
484 data was extracted and analyzed using custom scripts in Matlab (The MathWorks, Natick, MA,  
485 USA). The two output signal data was demodulated from the raw signal based on the LED  
486 modulation frequency. To normalize the data and correct for bleaching, the 405 nm channel signal  
487 was fitted to a polynomial over time and subtracted from the 470 nm GCaMP signal, yielding the  
488 DF/F value.

## 489 **Perfusions and Histology**

490 Following the conclusion of behavioral experiments, animals were anesthetized using 5%  
491 isoflurane and given a lethal dose (1.0 mL) cocktail of ketamine/xylazine (10 mg/ml ketamine, 1  
492 mg/ml xylazine). They were then transcardially perfused with 10 mL of 1X PBS followed by 10 mL  
493 4% paraformaldehyde (PFA). Brains were extracted and left in 4% PFA overnight and then  
494 transferred to a 30% sucrose solution until slicing. The brains were frozen and sliced on a sliding  
495 microtome (Leica Biosystems, Wetzlar, Germany) and placed in cryoprotectant in a well-plate.  
496 Slices were then washed in 1X PBS, mounted on slides (Fisherbrand Superfrost Plus,  
497 ThermoFisher Scientific, Waltham, MA, USA) and air dried (covered). ProLong Gold antifade  
498 reagent (Invitrogen, ThermoFisher Scientific) was injected on top of the slices and a cover slip  
499 (Slip-rite, ThermoFisher Scientific) was placed on top and the slides were left to dry overnight  
500 (covered). Viral injection, fiber photometry cannula implant, and optogenetic cannula implant  
501 placements were histologically verified on a fluorescence microscope (Leitz DMRB, Leica).

## 502 **Movement and Freezing Behavior Analysis**

503 Following the recording of location data using Ethovision, post data collection analysis was  
504 performed to identify movement initiations using Ethovision's built in movement detection  
505 software. The detection settings used were a 10 sample averaging window, 2.25 cm/sec start  
506 velocity threshold, and 2 cm/sec stop velocity threshold. Additionally, we used open source code  
507 (Pennington et al., 2019) to identify freezing. The parameters we used for this analysis were a  
508 motion cutoff of 9.0, freezing threshold of 1000, and minimum freeze duration of 25 samples (1  
509 second).

## 510 **Fiber Photometry Data Analysis**

511 Data was analyzed in PyCharm CE (JetBrains, Prague, Czechia) environment. Behavioral,  
512 location, and movement initiation data was extracted from both Ethovision and Arduino and  
513 synced to Synapse fiber photometry data. From this we extracted the behavioral data (percent  
514 avoidance, avoidance latency, and freezing) across all five days of learning. Additionally, we  
515 generated peri-event time histograms and heatmaps by time-locking the neural activity (dF/F) and  
516 z-scoring the signal to the baseline period (last 10 seconds of inter-trial-interval (ITI) preceding  
517 the event). These events included CS (light) onset (also split into successful and unsuccessful  
518 trials), avoidance movement initiation (movements during the 10 second light only period of  
519 successful trials), and freezing behavior initiation (freezing during the 10 second light only period  
520 of all trials). In addition, we also analyzed movement initiations during the ITI periods across all  
521 days. The heatmaps for avoidance movements and freezing were sorted by avoidance latency  
522 and freezing duration respectively. Quantification was done using the average signal across the  
523 following time windows:

524 CS onset: Baseline (-1 to 0 sec), CS response (0 to 1 sec)

525 CS successful vs. unsuccessful: Baseline (-1 to 0 sec), Initial CS response (0 to 1 sec), Pre-  
526 avoidance (1 to 2 sec), Post-avoidance (9 to 10 sec)

527 Avoidance movement: Baseline (-10 to -8 sec), Pre-avoidance (-3 to -1 sec), Avoidance (-1 to 1  
528 sec), Post-avoid: (1 to 3 sec)

529 ITI movement: Baseline (-10 to -8 sec), Pre-movement (-3 to -1 sec), Movement (-1 to 1 sec),  
530 Post-movement: (1 to 3 sec)

531 Freezing: Baseline (-2 to -1.5 sec), Freezing (0 to 0.5 sec)

532 All other non-avoidance movement controls were quantified identically to avoidance movement.

533 Lastly, histograms of the distribution of velocity and movement duration for all movement  
534 parameters were generated in Prism using a bin width of 1 cm/sec and 1 second respectively.

535 **Statistical Analysis**

536 Statistical Analysis was performed with Prism 8 (Graphpad Software, San Diego, CA, USA).  
537 Normality was tested with D'Agostino & Pearson normality test. Paired t-test (two-tailed, assume  
538 gaussian distribution), one-way repeated measures ANOVA with Geisser-Greenhouse correction  
539 with Sidak's and Tukey's correction for multiple comparisons, and two-way repeated measures  
540 ANOVA with Sidak's and Tukey's correction for multiple comparisons (assume sphericity) was  
541 used.

542 **Data and Code Accessibility**

543 All data and code are freely available through contacting the corresponding author directly.

544 **ACKNOWLEDGEMENTS**

545 We would like to acknowledge Dr. Pinelopi Kyriazi and Dr. Drew B. Headley from Dr. Denis Pare's  
546 lab for their guidance regarding construction of the active avoidance apparatus and for sharing  
547 custom arduino code for running the active avoidance experiments.

548 **FUNDING**

549 LAG is funded by a Chan Zuckerberg Biohub award and a Kavli Institute for Fundamental  
550 Neuroscience award.

551 **COMPETING INTERESTS**

552 All authors declare no competing interests.

## REFERENCES

- Adhikari, A., Lerner, T. N., Finkelstein, J., Pak, S., Jennings, J. H., Davidson, T. J., Ferenczi, E., Gunaydin, L. A., Mirzabekov, J. J., Ye, L., Kim, S.-Y., Lei, A., & Deisseroth, K. (2015). Basomedial amygdala mediates top-down control of anxiety and fear. *Nature*, *527*(7577), 179–185. <https://doi.org/10.1038/nature15698>
- Ährlund-Richter, S., Xuan, Y., van Lunteren, J. A., Kim, H., Ortiz, C., Pollak Dorocic, I., Meletis, K., & Carlén, M. (2019). A whole-brain atlas of monosynaptic input targeting four different cell types in the medial prefrontal cortex of the mouse. *Nature Neuroscience*, *22*(4), 657–668. <https://doi.org/10.1038/s41593-019-0354-y>
- Amorapanth, P., LeDoux, J. E., & Nader, K. (2000). Different lateral amygdala outputs mediate reactions and actions elicited by a fear-arousing stimulus. *Nature Neuroscience*, *3*(1), 74–79. <https://doi.org/10.1038/71145>
- Balleine, B. W., & O'Doherty, J. P. (2010). Human and rodent homologies in action control: corticostriatal determinants of goal-directed and habitual action. *Neuropsychopharmacology: Official Publication of the American College of Neuropsychopharmacology*, *35*(1), 48–69. <https://doi.org/10.1038/npp.2009.131>
- Beck, K. D., Jiao, X., Smith, I. M., Myers, C. E., Pang, K. C. H., & Servatius, R. J. (2014). ITI-Signals and Prelimbic Cortex Facilitate Avoidance Acquisition and Reduce Avoidance Latencies, Respectively, in Male WKY Rats. *Frontiers in Behavioral Neuroscience*, *8*, 403. <https://doi.org/10.3389/fnbeh.2014.00403>
- Boeke, E. A., Moscarello, J. M., LeDoux, J. E., Phelps, E. A., & Hartley, C. A. (2017). Active Avoidance: Neural Mechanisms and Attenuation of Pavlovian Conditioned Responding. *The Journal of Neuroscience: The Official Journal of the Society for Neuroscience*, *37*(18), 4808–4818. <https://doi.org/10.1523/JNEUROSCI.3261-16.2017>
- Boschen, S. L., Wietzikoski, E. C., Winn, P., & Da Cunha, C. (2011). The role of nucleus

accumbens and dorsolateral striatal D2 receptors in active avoidance conditioning.

*Neurobiology of Learning and Memory*, 96(2), 254–262.

<https://doi.org/10.1016/j.nlm.2011.05.002>

Bravo-Rivera, C., Roman-Ortiz, C., Brignoni-Perez, E., Sotres-Bayon, F., & Quirk, G. J. (2014).

Neural structures mediating expression and extinction of platform-mediated avoidance. *The Journal of Neuroscience: The Official Journal of the Society for Neuroscience*, 34(29),

9736–9742. <https://doi.org/10.1523/JNEUROSCI.0191-14.2014>

Bravo-Rivera, C., Roman-Ortiz, C., Montesinos-Cartagena, M., & Quirk, G. J. (2015). Persistent

active avoidance correlates with activity in prelimbic cortex and ventral striatum. *Frontiers in Behavioral Neuroscience*, 9, 184. <https://doi.org/10.3389/fnbeh.2015.00184>

Burgos-Robles, A., Kimchi, E. Y., Izadmehr, E. M., Porzenheim, M. J., Ramos-Guasp, W. A.,

Nieh, E. H., Felix-Ortiz, A. C., Namburi, P., Leppla, C. A., Presbrey, K. N., Anandalingam,

K. K., Pagan-Rivera, P. A., Anahtar, M., Beyeler, A., & Tye, K. M. (2017). Amygdala inputs to prefrontal cortex guide behavior amid conflicting cues of reward and punishment. *Nature Neuroscience*, 20(6), 824–835. <https://doi.org/10.1038/nn.4553>

<https://doi.org/10.1038/nn.4553>

Burgos-Robles, A., Vidal-Gonzalez, I., & Quirk, G. J. (2009). Sustained conditioned responses

in prelimbic prefrontal neurons are correlated with fear expression and extinction failure.

*The Journal of Neuroscience: The Official Journal of the Society for Neuroscience*, 29(26),

8474–8482. <https://doi.org/10.1523/JNEUROSCI.0378-09.2009>

Capuzzo, G., & Floresco, S. B. (2020). Prelimbic and Infralimbic Prefrontal Regulation of Active

and Inhibitory Avoidance and Reward-Seeking. *The Journal of Neuroscience: The Official Journal of the Society for Neuroscience*, 40(24), 4773–4787.

<https://doi.org/10.1523/JNEUROSCI.0414-20.2020>

Chen, T.-W., Wardill, T. J., Sun, Y., Pulver, S. R., Renninger, S. L., Baohan, A., Schreiter, E. R.,

Kerr, R. A., Orger, M. B., Jayaraman, V., Looger, L. L., Svoboda, K., & Kim, D. S. (2013).

Ultra-sensitive fluorescent proteins for imaging neuronal activity. *Published as: Nature*,



499(7458), 295–300.

Choi, J.-S., Cain, C. K., & LeDoux, J. E. (2010). The role of amygdala nuclei in the expression of auditory signaled two-way active avoidance in rats. *Learning & Memory*, *17*(3), 139–147.

<https://doi.org/10.1101/lm.1676610>

Cho, J.-H., Deisseroth, K., & Bolshakov, V. Y. (2013). Synaptic encoding of fear extinction in mPFC-amygdala circuits. *Neuron*, *80*(6), 1491–1507.

<https://doi.org/10.1016/j.neuron.2013.09.025>

Collins, K. A., Mendelsohn, A., Cain, C. K., & Schiller, D. (2014). Taking action in the face of threat: neural synchronization predicts adaptive coping. *The Journal of Neuroscience: The Official Journal of the Society for Neuroscience*, *34*(44), 14733–14738.

<https://doi.org/10.1523/JNEUROSCI.2152-14.2014>

Corcoran, K. A., & Quirk, G. J. (2007). Activity in prelimbic cortex is necessary for the expression of learned, but not innate, fears. *The Journal of Neuroscience: The Official Journal of the Society for Neuroscience*, *27*(4), 840–844.

<https://doi.org/10.1523/JNEUROSCI.5327-06.2007>

Courtin, J., Chaudun, F., Rozeske, R. R., Karalis, N., Gonzalez-Campo, C., Wurtz, H., Abdi, A., Baufreton, J., Bienvenu, T. C. M., & Herry, C. (2014). Prefrontal parvalbumin interneurons shape neuronal activity to drive fear expression. *Nature*, *505*(7481), 92–96.

<https://doi.org/10.1038/nature12755>

Darvas, M., Fadok, J. P., & Palmiter, R. D. (2011). Requirement of dopamine signaling in the amygdala and striatum for learning and maintenance of a conditioned avoidance response.

*Learning & Memory*, *18*(3), 136–143. <https://doi.org/10.1101/lm.2041211>

Dejean, C., Courtin, J., Karalis, N., Chaudun, F., Wurtz, H., Bienvenu, T. C. M., & Herry, C. (2016). Prefrontal neuronal assemblies temporally control fear behaviour. *Nature*,

*535*(7612), 420–424. <https://doi.org/10.1038/nature18630>

Delgado, M. R., Jou, R. L., Ledoux, J. E., & Phelps, E. A. (2009). Avoiding negative outcomes:

- tracking the mechanisms of avoidance learning in humans during fear conditioning. *Frontiers in Behavioral Neuroscience*, 3, 33. <https://doi.org/10.3389/neuro.08.033.2009>
- Diehl, M. M., Bravo-Rivera, C., Rodriguez-Romaguera, J., Pagan-Rivera, P. A., Burgos-Robles, A., Roman-Ortiz, C., & Quirk, G. J. (2018). Active avoidance requires inhibitory signaling in the rodent prelimbic prefrontal cortex. *eLife*, 7. <https://doi.org/10.7554/eLife.34657>
- Diehl, M. M., Iravedra-Garcia, J. M., Morán-Sierra, J., Rojas-Bowe, G., Gonzalez-Diaz, F. N., Valentín-Valentín, V. P., & Quirk, G. J. (2020). Divergent projections of the prelimbic cortex bidirectionally regulate active avoidance. *eLife*, 9. <https://doi.org/10.7554/eLife.59281>
- Dombrowski, P. A., Maia, T. V., Boschen, S. L., Bortolanza, M., Wendler, E., Schwarting, R. K. W., Brandão, M. L., Winn, P., Blaha, C. D., & Da Cunha, C. (2013). Evidence that conditioned avoidance responses are reinforced by positive prediction errors signaled by tonic striatal dopamine. *Behavioural Brain Research*, 241, 112–119. <https://doi.org/10.1016/j.bbr.2012.06.031>
- Duvarci, S., & Pare, D. (2014). Amygdala microcircuits controlling learned fear. *Neuron*, 82(5), 966–980. <https://doi.org/10.1016/j.neuron.2014.04.042>
- Fenton, G. E., Pollard, A. K., Halliday, D. M., Mason, R., Bredy, T. W., & Stevenson, C. W. (2014). Persistent prelimbic cortex activity contributes to enhanced learned fear expression in females. *Learning & Memory*, 21(2), 55–60. <https://doi.org/10.1101/lm.033514.113>
- Friedman, A., Homma, D., Gibb, L. G., Amemori, K.-I., Rubin, S. J., Hood, A. S., Riad, M. H., & Graybiel, A. M. (2015). A Corticostriatal Path Targeting Striosomes Controls Decision-Making under Conflict. *Cell*, 161(6), 1320–1333. <https://doi.org/10.1016/j.cell.2015.04.049>
- Garrido, P., De Blas, M., Giné, E., Santos, Á., & Mora, F. (2012). Aging impairs the control of prefrontal cortex on the release of corticosterone in response to stress and on memory consolidation. *Neurobiology of Aging*, 33(4), 827.e1–e9. <https://doi.org/10.1016/j.neurobiolaging.2011.06.011>
- Gentry, R. N., Lee, B., & Roesch, M. R. (2016). Phasic dopamine release in the rat nucleus

- accumbens predicts approach and avoidance performance. *Nature Communications*, 7, 13154. <https://doi.org/10.1038/ncomms13154>
- Giustino, T. F., & Maren, S. (2015). The Role of the Medial Prefrontal Cortex in the Conditioning and Extinction of Fear. *Frontiers in Behavioral Neuroscience*, 9, 298. <https://doi.org/10.3389/fnbeh.2015.00298>
- Gourley, S. L., & Taylor, J. R. (2016). Going and stopping: Dichotomies in behavioral control by the prefrontal cortex. *Nature Neuroscience*, 19(6), 656–664. <https://doi.org/10.1038/nn.4275>
- Grace, A. A., Floresco, S. B., Goto, Y., & Lodge, D. J. (2007). Regulation of firing of dopaminergic neurons and control of goal-directed behaviors. *Trends in Neurosciences*, 30(5), 220–227. <https://doi.org/10.1016/j.tins.2007.03.003>
- Gremel, C. M., & Costa, R. M. (2013). Orbitofrontal and striatal circuits dynamically encode the shift between goal-directed and habitual actions. *Nature Communications*, 4, 2264. <https://doi.org/10.1038/ncomms3264>
- Hart, G., Bradfield, L. A., & Balleine, B. W. (2018). Prefrontal Corticostriatal Disconnection Blocks the Acquisition of Goal-Directed Action. *The Journal of Neuroscience: The Official Journal of the Society for Neuroscience*, 38(5), 1311–1322. <https://doi.org/10.1523/JNEUROSCI.2850-17.2017>
- Hart, G., Bradfield, L. A., Fok, S. Y., Chieng, B., & Balleine, B. W. (2018). The Bilateral Prefronto-striatal Pathway Is Necessary for Learning New Goal-Directed Actions. *Current Biology: CB*, 28(14), 2218–2229.e7. <https://doi.org/10.1016/j.cub.2018.05.028>
- Herry, C., & Johansen, J. P. (2014). Encoding of fear learning and memory in distributed neuronal circuits. *Nature Neuroscience*, 17(12), 1644–1654. <https://doi.org/10.1038/nn.3869>
- Holzschneider, K., & Mulert, C. (2011). Neuroimaging in anxiety disorders. *Dialogues in Clinical Neuroscience*, 13(4), 453–461. <https://www.ncbi.nlm.nih.gov/pubmed/22275850>

- Huang, W.-C., Zucca, A., Levy, J., & Page, D. T. (2020). Social Behavior Is Modulated by Valence-Encoding mPFC-Amygdala Sub-circuitry. *Cell Reports*, 32(2), 107899. <https://doi.org/10.1016/j.celrep.2020.107899>
- Ishikawa, J., Sakurai, Y., Ishikawa, A., & Mitsushima, D. (2020). Contribution of the prefrontal cortex and basolateral amygdala to behavioral decision-making under reward/punishment conflict. *Psychopharmacology*, 237(3), 639–654. <https://doi.org/10.1007/s00213-019-05398-7>
- Ito, W., & Morozov, A. (2019). Prefrontal-amygdala plasticity enabled by observational fear. *Neuropsychopharmacology: Official Publication of the American College of Neuropsychopharmacology*, 44(10), 1778–1787. <https://doi.org/10.1038/s41386-019-0342-7>
- Izquierdo, L. A., Barros, D. M., da Costa, J. C., Furini, C., Zinn, C., Cammarota, M., Bevilaqua, L. R., & Izquierdo, I. (2007). A link between role of two prefrontal areas in immediate memory and in long-term memory consolidation. *Neurobiology of Learning and Memory*, 88(2), 160–166. <https://doi.org/10.1016/j.nlm.2007.04.014>
- Jercog, D., Winke, N., Sung, K., Fernandez, M. M., Francioni, C., Rajot, D., Courtin, J., Chaudun, F., Jercog, P. E., Valerio, S., & Herry, C. (2021). Dynamical prefrontal population coding during defensive behaviours. *Nature*, 595(7869), 690–694. <https://doi.org/10.1038/s41586-021-03726-6>
- Killcross, S., Robbins, T. W., & Everitt, B. J. (1997). Different types of fear-conditioned behaviour mediated by separate nuclei within amygdala. *Nature*, 388(6640), 377–380. <https://doi.org/10.1038/41097>
- Klavir, O., Prigge, M., Sarel, A., Paz, R., & Yizhar, O. (2017). Manipulating fear associations via optogenetic modulation of amygdala inputs to prefrontal cortex. *Nature Neuroscience*, 20(6), 836–844. <https://doi.org/10.1038/nn.4523>
- Kravitz, A. V., & Kreitzer, A. C. (2012). Striatal mechanisms underlying movement,

reinforcement, and punishment. *Physiology*, 27(3), 167–177.

<https://doi.org/10.1152/physiol.00004.2012>

Kyriazi, P., Headley, D. B., & Pare, D. (2018). Multi-dimensional Coding by Basolateral Amygdala Neurons. *Neuron*, 99(6), 1315–1328.e5.

<https://doi.org/10.1016/j.neuron.2018.07.036>

Lázaro-Muñoz, G., LeDoux, J. E., & Cain, C. K. (2010). Sidman instrumental avoidance initially depends on lateral and basal amygdala and is constrained by central amygdala-mediated Pavlovian processes. *Biological Psychiatry*, 67(12), 1120–1127.

<https://doi.org/10.1016/j.biopsych.2009.12.002>

LeDoux, J. E., Moscarello, J., Sears, R., & Campese, V. (2017). The birth, death and resurrection of avoidance: a reconceptualization of a troubled paradigm. *Molecular Psychiatry*, 22(1), 24–36. <https://doi.org/10.1038/mp.2016.166>

Lee, A. T., Vogt, D., Rubenstein, J. L., & Sohal, V. S. (2014). A class of GABAergic neurons in the prefrontal cortex sends long-range projections to the nucleus accumbens and elicits acute avoidance behavior. *The Journal of Neuroscience: The Official Journal of the Society for Neuroscience*, 34(35), 11519–11525. <https://doi.org/10.1523/JNEUROSCI.1157-14.2014>

Likhtik, E., Stujenske, J. M., Topiwala, M. A., Harris, A. Z., & Gordon, J. A. (2014). Prefrontal entrainment of amygdala activity signals safety in learned fear and innate anxiety. *Nature Neuroscience*, 17(1), 106–113. <https://doi.org/10.1038/nn.3582>

Loewke, A. C., Minerva, A. R., Nelson, A. B., Kreitzer, A. C., & Gunaydin, L. A. (2021). Frontostriatal Projections Regulate Innate Avoidance Behavior. *The Journal of Neuroscience: The Official Journal of the Society for Neuroscience*, 41(25), 5487–5501. <https://doi.org/10.1523/JNEUROSCI.2581-20.2021>

Marek, R., Xu, L., Sullivan, R. K. P., & Sah, P. (2018). Excitatory connections between the prelimbic and infralimbic medial prefrontal cortex show a role for the prelimbic cortex in fear

extinction. *Nature Neuroscience*, 21(5), 654–658. [https://doi.org/10.1038/s41593-018-0137-](https://doi.org/10.1038/s41593-018-0137-x)

x

Maren, S., Poremba, A., & Gabriel, M. (1991). Basolateral amygdaloid multi-unit neuronal correlates of discriminative avoidance learning in rabbits. *Brain Research*, 549(2), 311–316. [https://doi.org/10.1016/0006-8993\(91\)90473-9](https://doi.org/10.1016/0006-8993(91)90473-9)

Meyer, H. C., Odriozola, P., Cohodes, E. M., Mandell, J. D., Li, A., Yang, R., Hall, B. S., Haberman, J. T., Zacharek, S. J., Liston, C., Lee, F. S., & Gee, D. G. (2019). Ventral hippocampus interacts with prelimbic cortex during inhibition of threat response via learned safety in both mice and humans. *Proceedings of the National Academy of Sciences of the United States of America*. <https://doi.org/10.1073/pnas.1910481116>

Oleson, E. B., Gentry, R. N., Chioma, V. C., & Cheer, J. F. (2012). Subsecond dopamine release in the nucleus accumbens predicts conditioned punishment and its successful avoidance. *The Journal of Neuroscience: The Official Journal of the Society for Neuroscience*, 32(42), 14804–14808. <https://doi.org/10.1523/JNEUROSCI.3087-12.2012>

Pennington, Z. T., Dong, Z., Feng, Y., Vetere, L. M., Page-Harley, L., Shuman, T., & Cai, D. J. (2019). ezTrack: An open-source video analysis pipeline for the investigation of animal behavior. *Scientific Reports*, 9(1), 19979. <https://doi.org/10.1038/s41598-019-56408-9>

Peters, Y. M., O'Donnell, P., & Carelli, R. M. (2005). Prefrontal cortical cell firing during maintenance, extinction, and reinstatement of goal-directed behavior for natural reward. *Synapse*, 56(2), 74–83. <https://doi.org/10.1002/syn.20129>

Piantadosi, P. T., Yeates, D. C. M., & Floresco, S. B. (2018). Cooperative and dissociable involvement of the nucleus accumbens core and shell in the promotion and inhibition of actions during active and inhibitory avoidance. *Neuropharmacology*, 138, 57–71. <https://doi.org/10.1016/j.neuropharm.2018.05.028>

Pinto, L., & Dan, Y. (2015). Cell-Type-Specific Activity in Prefrontal Cortex during Goal-Directed Behavior. *Neuron*, 87(2), 437–450. <https://doi.org/10.1016/j.neuron.2015.06.021>

- Pitts, E. G., Li, D. C., & Gourley, S. L. (2018). Bidirectional coordination of actions and habits by TrkB in mice. *Scientific Reports*, 8(1), 4495. <https://doi.org/10.1038/s41598-018-22560-x>
- Poremba, A., & Gabriel, M. (1999). Amygdala neurons mediate acquisition but not maintenance of instrumental avoidance behavior in rabbits. *The Journal of Neuroscience: The Official Journal of the Society for Neuroscience*, 19(21), 9635–9641.  
<https://www.ncbi.nlm.nih.gov/pubmed/10531465>
- Ramirez, F., Moscarello, J. M., LeDoux, J. E., & Sears, R. M. (2015). Active avoidance requires a serial basal amygdala to nucleus accumbens shell circuit. *The Journal of Neuroscience: The Official Journal of the Society for Neuroscience*, 35(8), 3470–3477.  
<https://doi.org/10.1523/JNEUROSCI.1331-14.2015>
- Rauch, S. L., & Shin, L. M. (2002). Structural and functional imaging of anxiety and stress disorders. In *Neuropsychopharmacology: The Fifth Generation of Progress* (pp. 953–966).
- Redgrave, P., Rodriguez, M., Smith, Y., Rodriguez-Oroz, M. C., Lehericy, S., Bergman, H., Agid, Y., DeLong, M. R., & Obeso, J. A. (2010). Goal-directed and habitual control in the basal ganglia: implications for Parkinson's disease. *Nature Reviews. Neuroscience*, 11(11), 760–772. <https://doi.org/10.1038/nrn2915>
- Rodriguez-Romaguera, J., Greenberg, B. D., Rasmussen, S. A., & Quirk, G. J. (2016). An Avoidance-Based Rodent Model of Exposure With Response Prevention Therapy for Obsessive-Compulsive Disorder. *Biological Psychiatry*, 80(7), 534–540.  
<https://doi.org/10.1016/j.biopsych.2016.02.012>
- Sharpe, M. J., & Killcross, S. (2014). The prelimbic cortex uses higher-order cues to modulate both the acquisition and expression of conditioned fear. *Frontiers in Systems Neuroscience*, 8, 235. <https://doi.org/10.3389/fnsys.2014.00235>
- Sierra-Mercado, D., Padilla-Coreano, N., & Quirk, G. J. (2011). Dissociable roles of prelimbic and infralimbic cortices, ventral hippocampus, and basolateral amygdala in the expression and extinction of conditioned fear. *Neuropsychopharmacology: Official Publication of the*

*American College of Neuropsychopharmacology*, 36(2), 529–538.

<https://doi.org/10.1038/npp.2010.184>

Sotres-Bayon, F., Sierra-Mercado, D., Pardilla-Delgado, E., & Quirk, G. J. (2012). Gating of fear in prelimbic cortex by hippocampal and amygdala inputs. *Neuron*, 76(4), 804–812.

<https://doi.org/10.1016/j.neuron.2012.09.028>

Sripada, R. K., Garfinkel, S. N., & Liberzon, I. (2013). Avoidant symptoms in PTSD predict fear circuit activation during multimodal fear extinction. *Frontiers in Human Neuroscience*, 7, 672. <https://doi.org/10.3389/fnhum.2013.00672>

Stelly, C. E., Haug, G. C., Fonzi, K. M., Garcia, M. A., Tritley, S. C., Magnon, A. P., Ramos, M. A. P., & Wanat, M. J. (2019). Pattern of dopamine signaling during aversive events predicts active avoidance learning. *Proceedings of the National Academy of Sciences of the United States of America*, 116(27), 13641–13650. <https://doi.org/10.1073/pnas.1904249116>

Terburg, D., Scheggia, D., Triana Del Rio, R., Klumpers, F., Ciobanu, A. C., Morgan, B., Montoya, E. R., Bos, P. A., Giobellina, G., van den Burg, E. H., de Gelder, B., Stein, D. J., Stoop, R., & van Honk, J. (2018). The Basolateral Amygdala Is Essential for Rapid Escape: A Human and Rodent Study. *Cell*, 175(3), 723–735.e16.

<https://doi.org/10.1016/j.cell.2018.09.028>

Torres-García, M. E., Medina, A. C., Quirarte, G. L., & Prado-Alcalá, R. A. (2017). Differential Effects of Inactivation of Discrete Regions of Medial Prefrontal Cortex on Memory Consolidation of Moderate and Intense Inhibitory Avoidance Training. *Frontiers in Pharmacology*, 8, 842. <https://doi.org/10.3389/fphar.2017.00842>

Tovote, P., Fadok, J. P., & Lüthi, A. (2015). Neuronal circuits for fear and anxiety. *Nature Reviews. Neuroscience*, 16(6), 317–331. <https://doi.org/10.1038/nrn3945>

Vander Weele, C. M., Siciliano, C. A., Matthews, G. A., Namburi, P., Izadmehr, E. M., Espinel, I. C., Nieh, E. H., Schut, E. H. S., Padilla-Coreano, N., Burgos-Robles, A., Chang, C.-J., Kimchi, E. Y., Beyeler, A., Wichmann, R., Wildes, C. P., & Tye, K. M. (2018). Dopamine



enhances signal-to-noise ratio in cortical-brainstem encoding of aversive stimuli. *Nature*, 563(7731), 397–401. <https://doi.org/10.1038/s41586-018-0682-1>

- Wendler, E., Gaspar, J. C. C., Ferreira, T. L., Barbiero, J. K., Andreatini, R., Vital, M. A. B. F., Blaha, C. D., Winn, P., & Da Cunha, C. (2014). The roles of the nucleus accumbens core, dorsomedial striatum, and dorsolateral striatum in learning: performance and extinction of Pavlovian fear-conditioned responses and instrumental avoidance responses. *Neurobiology of Learning and Memory*, 109, 27–36. <https://doi.org/10.1016/j.nlm.2013.11.009>
- Wenzel, J. M., Oleson, E. B., Gove, W. N., Cole, A. B., Gyawali, U., Dantrassy, H. M., Bluett, R. J., Dryanovski, D. I., Stuber, G. D., Deisseroth, K., Mathur, B. N., Patel, S., Lupica, C. R., & Cheer, J. F. (2018). Phasic Dopamine Signals in the Nucleus Accumbens that Cause Active Avoidance Require Endocannabinoid Mobilization in the Midbrain. *Current Biology: CB*, 28(9), 1392–1404.e5. <https://doi.org/10.1016/j.cub.2018.03.037>
- Wietzikoski, E. C., Boschen, S. L., Miyoshi, E., Bortolanza, M., Dos Santos, L. M., Frank, M., Brandão, M. L., Winn, P., & Da Cunha, C. (2012). Roles of D1-like dopamine receptors in the nucleus accumbens and dorsolateral striatum in conditioned avoidance responses. *Psychopharmacology*, 219(1), 159–169. <https://doi.org/10.1007/s00213-011-2384-3>
- Yin, H. H., & Knowlton, B. J. (2006). The role of the basal ganglia in habit formation. *Nature Reviews. Neuroscience*, 7(6), 464–476. <https://doi.org/10.1038/nrn1919>
- Zhang, Y., Fukushima, H., & Kida, S. (2011). Induction and requirement of gene expression in the anterior cingulate cortex and medial prefrontal cortex for the consolidation of inhibitory avoidance memory. *Molecular Brain*, 4, 4. <https://doi.org/10.1186/1756-6606-4-4>

## SUPPLEMENTAL FIGURES

Kajs et al. Supplemental Figure 1

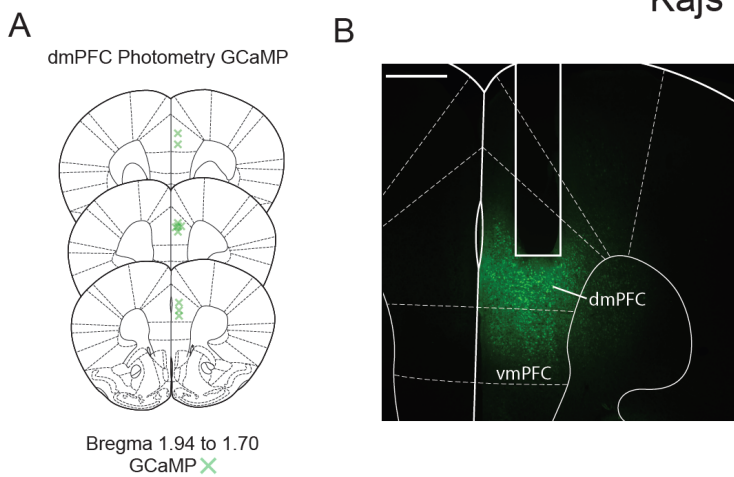

**Supplemental Figure 1.** Histology and targeting for dmPFC photometry surgeries. (A) Verification of GCaMP virus injection in dmPFC (N = 10 mice). (B) Representative histological image of fiber photometry implant and GCaMP viral expression in dmPFC. Scale bar 500  $\mu$ m.

## Kajs et al. Supplemental Figure 2

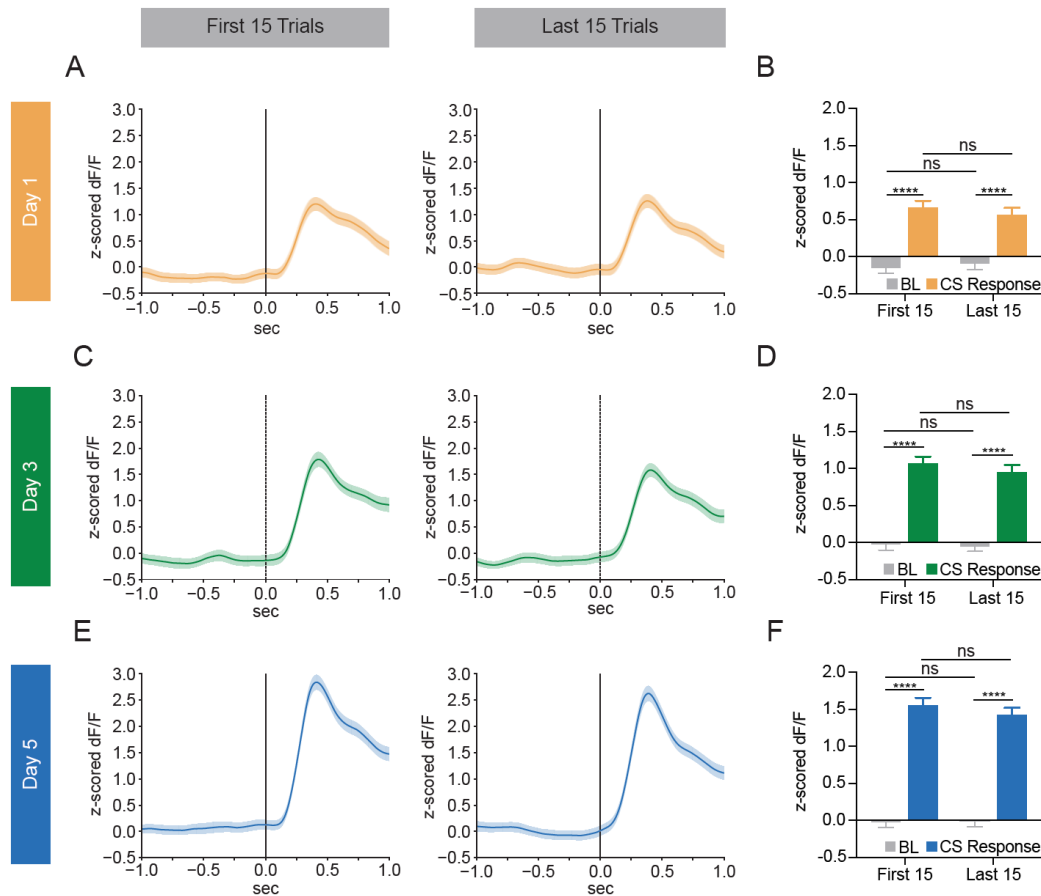

**Supplemental Figure 2.** No within-day differences in dmPFC neural activity at CS onset. (A) PETHs of dmPFC calcium signal show no differences between the first 15 trials (left) and the last 15 trials (right) on day 1 of training. (B) Quantification of the day 1 PETHs show no significant differences in calcium signal between the first 15 trials and the last 15 trials during the baseline (-1 to 0 s) or CS (0 to 1 s) periods (Two-way ANOVA, Part of Session x Task Period  $p = 0.3176$ , Part of Session  $p = 0.8385$ , Task Period  $p < 0.0001$ ; Sidak's Multiple Comparisons Test, First 15 Baseline vs Last 15 Baseline  $p = 0.994$ , First 15 Baseline vs First 15 CS  $p < 0.0001$ , First 15 CS vs Last 15 CS  $p = 0.9509$ , Last 15 Baseline vs Last 15 CS  $p < 0.0001$ ;  $N = 10$  mice, First 15  $n = 150$  trials, Last 15  $n = 150$  trials). (C) PETHs of dmPFC calcium signal show no differences between the first 15 trials (left) and the last 15 trials (right) on day 3 of training. (D) Quantification of the day 3 PETHs show no significant differences in calcium signal between the first 15 trials and the last 15 trials during the baseline (-1 to 0 s) or CS (0 to 1 s) periods (Two-way ANOVA, Part of Session x Task Period  $p = 0.6153$ , Part of Session  $p = 0.3854$ , Task Period  $p < 0.0001$ ; Sidak's Multiple Comparisons Test, First 15 Baseline vs Last 15 Baseline  $p > 0.9999$ , First 15 Baseline vs First 15 CS  $p < 0.0001$ , First 15 CS vs Last 15 CS  $p = 0.9116$ , Last 15 Baseline vs Last 15 CS  $p < 0.0001$ ;  $N = 10$  mice, First 15  $n = 150$  trials, Last 15  $n = 150$  trials). (E) PETHs of dmPFC calcium signal show no differences between the first 15 trials (left) and the last 15 trials (right) on day 5 of training. (F) Quantification of the day 5 PETHs show no significant differences in calcium signal between the first 15 trials and the last 15 trials during the baseline (-1 to 0 s) or CS (0 to 1 s) periods (Two-way ANOVA, Part of Session x Task Period  $p = 0.388$ , Part of Session  $p = 0.4610$ , Task Period  $p < 0.0001$ ; Sidak's Multiple Comparisons Test, First 15 Baseline vs Last 15 Baseline  $p > 0.9999$ , First 15 Baseline vs First 15 CS  $p < 0.0001$ , First 15 CS vs Last 15 CS  $p = 0.8329$ , Last 15 Baseline vs Last 15 CS  $p < 0.0001$ ;  $N = 10$  mice, First 15  $n = 150$  trials, Last 15  $n = 150$  trials). ns = not significant, \*\*\*\*  $p \leq 0.0001$ .

### Kajs et al. Supplemental Figure 3

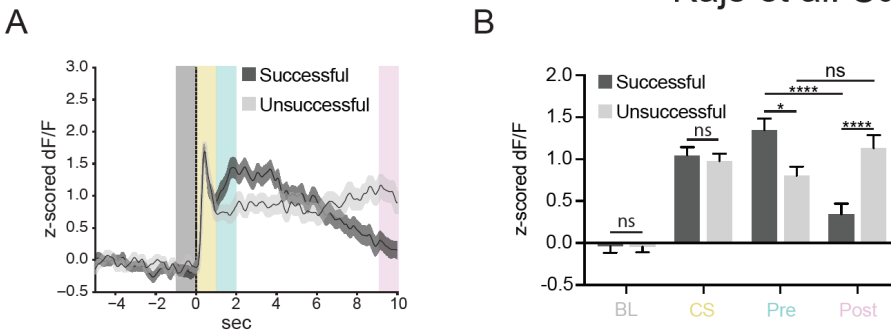

**Supplemental Figure 3.** Differences in dmPFC neural activity for successful versus unsuccessful trials. (A) PETH of calcium signal in dmPFC aligned to CS onset for successful (dark grey line) and unsuccessful (light grey line) trials shows differences in later parts of the trace when avoidances normally do or do not occur. Trials from Day 3 were used since equal numbers of successful and unsuccessful trials occur on this training day. Grey box, baseline period (BL); yellow box, CS response period (CS); teal box, pre avoidance period (Pre); pink box, post avoidance period (Post) (B) Quantification of the CS onset PETH shows no differences in calcium signal between successful and unsuccessful trials during the baseline period (-1 to 0 s) and the CS response period (0 to 1 s). However, the calcium signal in the dmPFC is significantly increased during successful trials compared to unsuccessful trials during the pre avoidance period (1 to 2 s) and significantly decreased during successful trials compared to unsuccessful trials during the post avoidance period (9 to 10 s) (Two-way ANOVA, Task Period x Trial Type  $p < 0.0001$ , Task Period  $p < 0.0001$ , Trial Type  $p = 0.5807$ ; Sidak's Multiple Comparisons Test, Successful Baseline vs Unsuccessful Baseline  $p > 0.9999$ , Successful CS Response vs Unsuccessful CS Response  $p = 0.986$ , Successful Pre Avoidance vs Unsuccessful Pre Avoidance  $p = 0.0022$ , Successful Post Avoidance vs Unsuccessful Post Avoidance  $p < 0.0001$ ;  $N = 10$  mice, Successful  $n = 147$  trials, Unsuccessful  $n = 153$  trials). ns = not significant, \*  $p \leq 0.05$ , \*\*\*\*  $p \leq 0.0001$ .

Kajs et al. Supplemental Figure 4

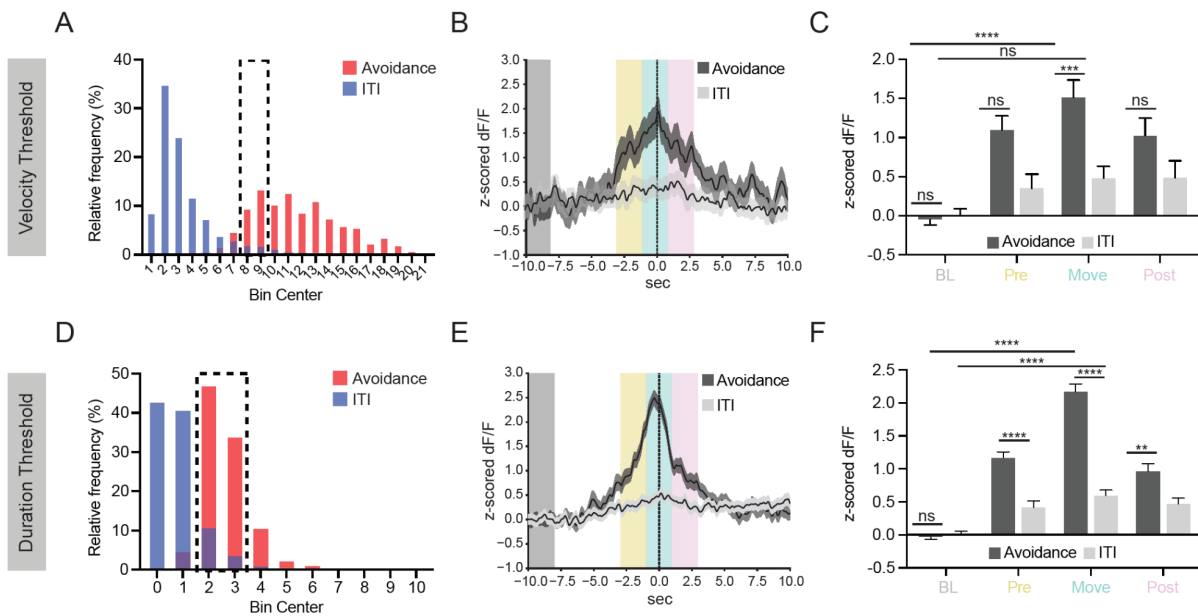

**Supplemental Figure 4.** Increased activity in the dmPFC during avoidance is not purely movement-related. (A) Distribution of movement velocities for intertrial (ITI) (blue) and avoidance (red) movements and their overlap (purple). (B) PETH of ITI and avoidance movements of similar velocities (7.5 cm/s to 9.5 cm/s) aligned to movement onset shows increase in calcium signal during avoidance movements that is not seen during ITI movements. Grey box, baseline period (BL); yellow box, pre movement period (Pre); teal box, movement period (Move); pink box, post movement period (Post) (C) Quantification of similar velocity movement PETH show dmPFC calcium signal is significantly increased during avoidance movements compared to ITI movements during the movement period (-1 to 1 s), but not during baseline (-10 to -8 s), pre-movement (-3 to -1 s), or post-movement (1 to 3 s) periods (Two-way ANOVA, Task Period x Movement Type  $p = 0.015$ , Task Period  $p < 0.0001$ , Movement Type  $p < 0.0001$ ; Sidak's Multiple Comparisons Test, Avoidance Baseline vs ITI Baseline  $p > 0.9999$ , Avoidance Baseline vs Avoidance Movement  $p < 0.0001$ , ITI Baseline vs ITI Movement  $p = 0.7853$ , Avoidance Pre-Movement vs ITI Pre-Movement  $p = 0.0701$ , Avoidance Movement vs ITI Movement  $p = 0.0009$ , Avoidance Post-Movement vs ITI Post-Movement  $p = 0.5713$ ;  $N = 10$  mice, Avoidance  $n = 58$  trials, ITI  $n = 60$  trials). (D) Distribution of movement durations for ITI (blue) and avoidance (red) movements and their overlap (purple). (E) PETH of ITI and avoidance movements of similar durations (1.5 s to 3.5 s) aligned to movement onset shows sharp increase in calcium signal during avoidance movements that is not seen during ITI movements. (F) Quantification of similar movement duration PETH shows dmPFC calcium signal is significantly increased during avoidance movements compared to ITI movements during pre-movement (-3 to -1 s), movement (-1 to 1 s), and post-movement (1 to 3 s) periods, but not during the baseline (-10 to -8 s) period (Two-way ANOVA, Task Period x Movement Type  $p < 0.0001$ , Task Period  $p < 0.0001$ , Movement Type  $p < 0.0001$ ; Sidak's Multiple Comparisons Test, Avoidance Baseline vs ITI Baseline  $p > 0.9999$ , Avoidance Baseline vs Avoidance Movement  $p < 0.0001$ , ITI Baseline vs ITI Movement  $p < 0.0001$ , Avoidance Pre-Movement vs ITI Pre-Movement  $p < 0.0001$ , Avoidance Movement vs ITI Movement  $p < 0.0001$ , Avoidance Post-Movement vs ITI Post-Movement  $p = 0.0019$ ;  $N = 10$  mice, Avoidance  $n = 205$  trials, ITI  $n = 227$  trials). ns = not significant, \*\*  $p \leq 0.01$ , \*\*\*  $p \leq 0.001$ , \*\*\*\*  $p \leq 0.0001$ .

Kajs et al. Supplemental Figure 5

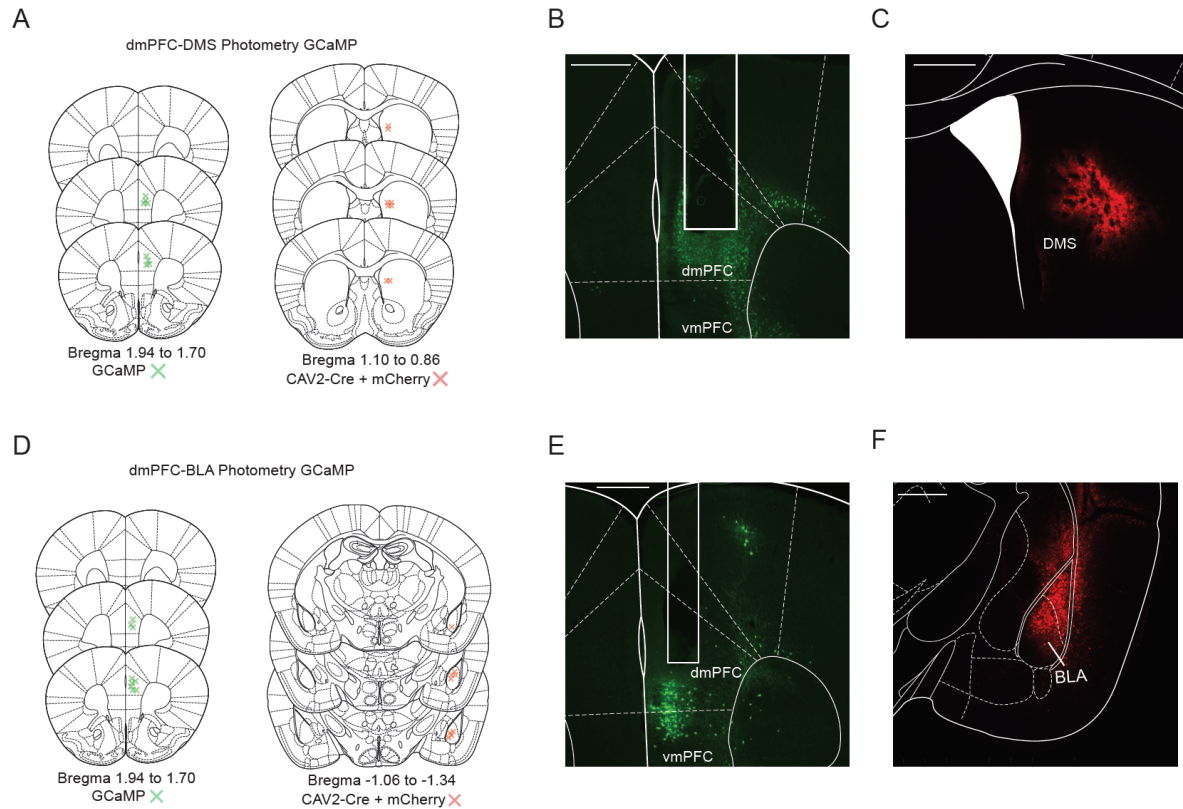

**Supplemental Figure 5.** Histology and targeting for dmPFC-DMS and dmPFC-BLA photometry surgeries. (A) Verification of GCaMP virus injection in dmPFC (left) and CAV2-Cre + mCherry viral injection in DMS (right) for dmPFC-DMS cohort (N = 8 mice). (B) Representative histological image of fiber photometry implant and GCaMP viral expression in dmPFC for the dmPFC-DMS cohort. (C) Representative histological image of CAV2-Cre + mCherry viral expression in the DMS for the dmPFC-DMS cohort. (D) Verification of GCaMP virus injection in dmPFC (left) and CAV2-Cre + mCherry viral injection in BLA (right) for dmPFC-BLA cohort (N = 9 mice). (E) Representative histological image of fiber photometry implant and GCaMP viral expression in dmPFC for the dmPFC-BLA cohort. (F) Representative histological image of CAV2-Cre + mCherry viral expression in the BLA for the dmPFC-BLA cohort. Scale bar 500  $\mu$ m.

Kajs et al. Supplemental Figure 6

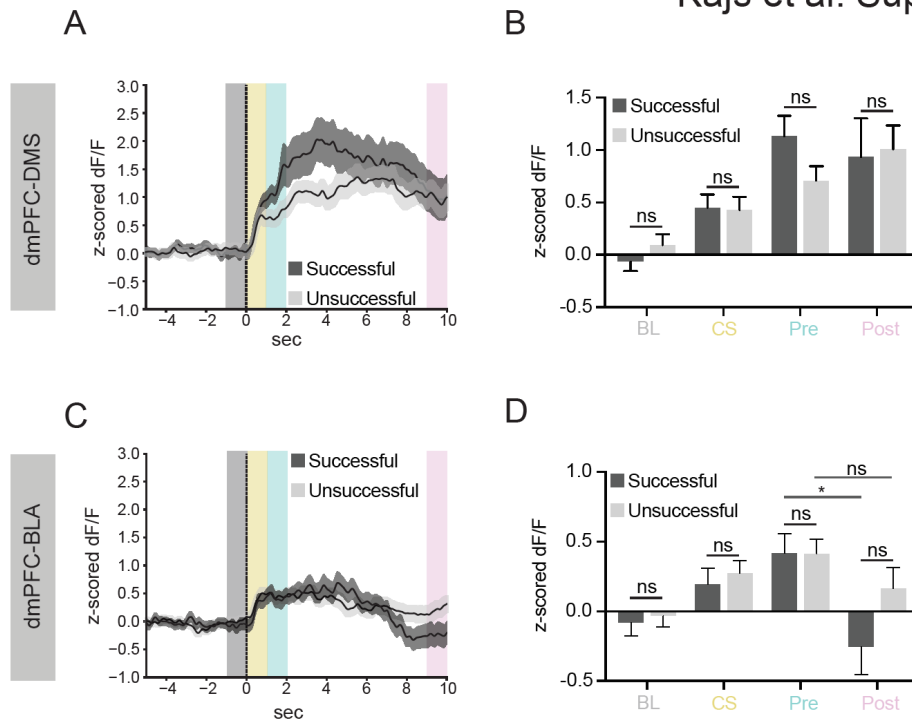

**Supplemental Figure 6.** No difference in dmPFC-DMS and dmPFC-BLA neural activity for successful versus unsuccessful trials. (A) PETH of calcium signal in the dmPFC-DMS projection aligned to CS onset for successful (dark grey line) and unsuccessful (light grey line) trials shows no differences between successful and unsuccessful traces. Trials from Day 3 were used since equal numbers of successful and unsuccessful trials occur on this training day. Grey box, baseline period (BL); yellow box, CS response period (CS); teal box, pre avoidance period (Pre); pink box, post avoidance period (Post) (B) Quantification of the CS onset PETH shows no differences in calcium signal between successful and unsuccessful trials during the baseline period (-1 to 0 s), CS response period (0 to 1 s), pre avoidance period (1 to 2 s), or post avoidance period (9 to 10 s) for the dmPFC-DMS projection (Two-way ANOVA, Task Period x Trial Type  $p < 0.4554$ , Task Period  $p < 0.0001$ , Trial Type  $p = 0.7025$ ; Sidak's Multiple Comparisons Test, Successful Baseline vs Unsuccessful Baseline  $p = 0.9633$ , Successful CS Response vs Unsuccessful CS Response  $p > 0.9999$ , Successful Pre Avoidance vs Unsuccessful Pre Avoidance  $p = 0.4172$ , Successful Post Avoidance vs Unsuccessful Post Avoidance  $p = 0.9978$ ;  $N = 8$  mice, Successful  $n = 126$  trials, Unsuccessful  $n = 114$  trials). (C) PETH of calcium signal in the dmPFC-BLA projection aligned to CS onset for successful (dark grey line) and unsuccessful (light grey line) trials shows no differences between successful and unsuccessful traces on Day 3. (D) Quantification of the CS onset PETH shows no differences in calcium signal between successful and unsuccessful trials during the baseline period (-1 to 0 s), the CS response period (0 to 1 s), the pre avoidance period (1 to 2 s), or the post avoidance period (9 to 10 s) for the dmPFC-BLA projection (Two-way ANOVA, Task Period x Trial Type  $p = 0.3127$ , Task Period  $p < 0.0001$ , Trial Type  $p = 0.1204$ ; Sidak's Multiple Comparisons Test, Successful Baseline vs Unsuccessful Baseline  $p > 0.9999$ , Successful CS Response vs Unsuccessful CS Response  $p > 0.9999$ , Successful Pre Avoidance vs Unsuccessful Pre Avoidance  $p > 0.9999$ , Successful Pre Avoidance vs Successful Post Avoidance  $p = 0.0137$ , Unsuccessful Pre Avoidance vs Unsuccessful Post Avoidance  $p = 0.9679$ , Successful Post Avoidance vs Unsuccessful Post Avoidance  $p = 0.3839$ ;  $N = 9$  mice, Successful  $n = 109$  trials, Unsuccessful  $n = 161$  trials). ns = not significant, \*  $p \leq 0.05$ .

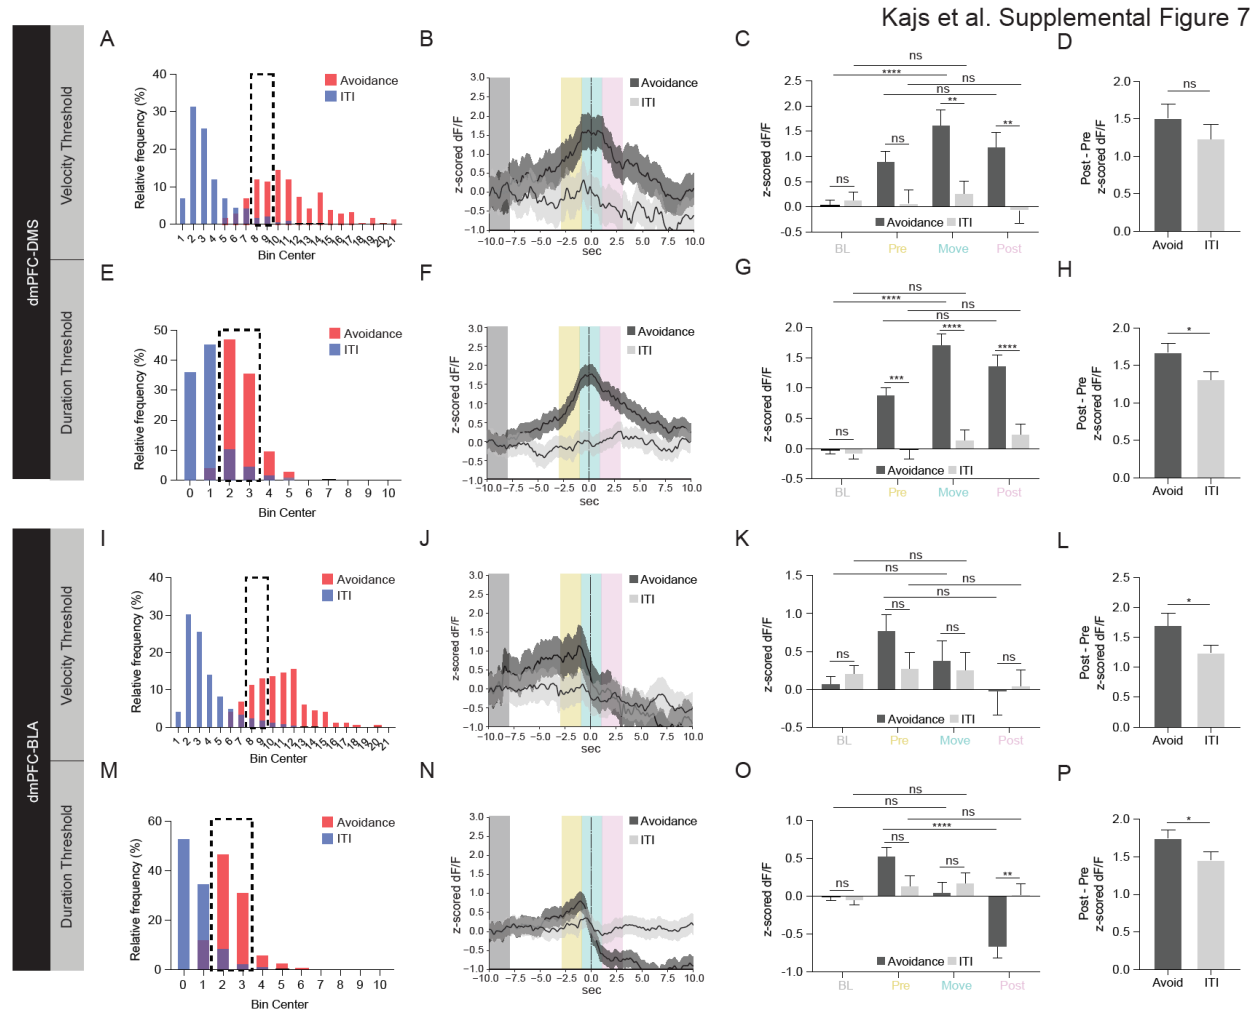

**Supplemental Figure 7.** Activity at avoidance onset in the dmPFC-DMS and dmPFC-BLA projections is not purely movement-related. (A) Distribution of movement velocities for ITI (blue) and avoidance (red) movements and their overlap (purple) for the dmPFC-DMS cohort. (B) PETH of ITI and avoidance movements of similar velocities (7.5 cm/s to 9.5 cm/s) aligned to movement onset shows increase in calcium signal during avoidance movements that is not seen during ITI movements in the dmPFC-DMS projection. Grey box, baseline period (BL); yellow box, pre movement period (Pre); teal box, movement period (Move); pink box, post movement period (Post) (C) Quantification of similar velocity movement PETH shows dmPFC-DMS calcium signal is significantly increased during avoidance movements compared to ITI movements during the movement (-1 to 1 s) and post-movement (1 to 3 s) periods, but not during baseline (-10 to -8 s) or pre-movement (-3 to -1 s) periods (Two-way ANOVA, Task Period x Movement Type  $p = 0.0097$ , Task Period  $p = 0.0049$ , Movement Type  $p < 0.0001$ ; Sidak's Multiple Comparisons Test, Avoidance Baseline vs ITI Baseline  $p > 0.9999$ , Avoidance Baseline vs Avoidance Movement  $p < 0.0001$ , ITI Baseline vs ITI Movement  $p > 0.9999$ , Avoidance Pre-Movement vs ITI Pre-Movement  $p = 0.3521$ , Pre-Movement Avoidance vs Post-Movement Avoidance  $p > 0.9999$ , Pre-Movement ITI vs Post Movement ITI  $p > 0.9999$ , Avoidance Movement vs ITI Movement  $p = 0.0021$ , Avoidance Post-Movement vs ITI Post-Movement  $p = 0.0065$ ;  $N = 8$  mice, Avoidance  $n = 47$  trials, ITI  $n = 38$  trials). (D) To compare the change in the dmPFC-DMS calcium signal between pre-movement and post-movement periods for avoidance and ITI movements, we calculated the absolute value of post-movement change in calcium signal minus pre-movement change calcium signal. We find no differences in the change in dmPFC-DMS calcium signal between pre-movement and post-movement periods when comparing avoidance and ITI movements of similar velocities (Unpaired T-test  $p = 0.3159$ ;  $N = 8$  mice, Avoidance  $n = 47$  trials, ITI  $n = 38$  trials). (E) Distribution of movement durations for ITI (blue) and avoidance (red) movements and their overlap (purple) for the dmPFC-DMS



cohort. (F) PETH of ITI and avoidance movements of similar durations (1.5 s to 3.5 s) aligned to movement onset shows increase in calcium signal during avoidance movements that is not seen during ITI movements in the dmPFC-DMS projection. (G) Quantification of similar movement duration PETH shows dmPFC-DMS calcium signal is significantly increased during avoidance movements compared to ITI movements during the pre-movement (-3 to -1 s), movement (-1 to 1 s), and post-movement (1 to 3 s) periods, but not during the baseline (-10 to -8 s) period (Two-way ANOVA, Task Period x Movement Type  $p < 0.0001$ , Task Period  $p < 0.0001$ , Movement Type  $p < 0.0001$ ; Sidak's Multiple Comparisons Test, Avoidance Baseline vs ITI Baseline  $p > 0.9999$ , Avoidance Baseline vs Avoidance Movement  $p < 0.0001$ , ITI Baseline vs ITI Movement  $p = 0.9999$ , Avoidance Pre-Movement vs ITI Pre-Movement  $p = 0.0003$ , Pre-Movement Avoidance vs Post-Movement Avoidance  $p = 0.3365$ , Pre-Movement ITI vs Post Movement ITI  $p = 0.9995$ , Avoidance Movement vs ITI Movement  $p < 0.0001$ , Avoidance Post-Movement vs ITI Post-Movement  $p < 0.0001$ ;  $N = 8$  mice, Avoidance  $n = 162$  trials, ITI  $n = 136$  trials). (H) The change in the dmPFC-DMS calcium signal between pre-movement and post-movement periods is significantly greater for avoidance movements compared to ITI movements of similar durations (Unpaired T-test  $p = 0.0166$ ;  $N = 8$  mice, Avoidance  $n = 162$  trials, ITI  $n = 136$  trials). (I) Distribution of movement velocities for ITI (blue) and avoidance (red) movements and their overlap (purple) for the dmPFC-BLA cohort. (J) PETH of ITI and avoidance movements of similar velocities (7.5 cm/s to 9.5 cm/s) aligned to movement onset shows decrease in calcium signal during avoidance movements that is not seen during ITI movements in the dmPFC-BLA projection. (K) Quantification of similar velocity movement PETH shows dmPFC-BLA calcium signal is not significantly different during avoidance movements compared to ITI movements during the baseline (-10 to 8 s), pre-movement (-3 to -1 s), movement (-1 to 1 s), and post-movement (1 to 3 s) periods (Two-way ANOVA, Task Period x Movement Type  $p = 0.4748$ , Task Period  $p = 0.0984$ , Movement Type  $p = 0.5066$ ; Sidak's Multiple Comparisons Test, Avoidance Baseline vs ITI Baseline  $p > 0.9999$ , Avoidance Baseline vs Avoidance Movement  $p > 0.9999$ , ITI Baseline vs ITI Movement  $p > 0.9999$ , Avoidance Pre-Movement vs ITI Pre-Movement  $p = 0.9625$ , Pre-Movement Avoidance vs Post-Movement Avoidance  $p = 0.4489$ , Pre-Movement ITI vs Post Movement ITI  $p > 0.9999$ , Avoidance Movement vs ITI Movement  $p > 0.9999$ , Avoidance Post-Movement vs ITI Post-Movement  $p > 0.9999$ ;  $N = 9$  mice, Avoidance  $n = 52$  trials, ITI  $n = 88$  trials) (L) The change in dmPFC-BLA calcium signal between pre-movement and post-movement periods is significantly greater for avoidance movements compared to ITI movements of similar velocities (Unpaired T-test  $p = 0.0487$ ;  $N = 9$  mice, Avoidance  $n = 52$  trials, ITI  $n = 88$  trials). (M) Distribution of movement durations for ITI (blue) and avoidance (red) movements and their overlap (purple) for the dmPFC-BLA cohort. (N) PETH of ITI and avoidance movements of similar durations (1.5 s to 3.5 s) aligned to movement onset shows decrease in calcium signal during avoidance movements that is not seen during ITI movements in the dmPFC-BLA projection. (O) Quantification of similar movement duration PETH shows dmPFC-BLA calcium signal is significantly decreased during avoidance movements compared to ITI movements during the post-movement (1 to 3 s) period, but not during the baseline (-10 to -8 s) pre-movement (-3 to -1 s), and movement (-1 to 1 s) periods (Two-way ANOVA, Task Period x Movement Type  $p = 0.0001$ , Task Period  $p < 0.0001$ , Movement Type  $p = 0.2688$ ; Sidak's Multiple Comparisons Test, Avoidance Baseline vs ITI Baseline  $p > 0.9999$ , Avoidance Baseline vs Avoidance Movement  $p > 0.9999$ , ITI Baseline vs ITI Movement  $p = 0.9935$ , Avoidance Pre-Movement vs ITI Pre-Movement  $p = 0.4972$ , Pre-Movement Avoidance vs Post-Movement Avoidance  $p < 0.0001$ , Pre-Movement ITI vs Post Movement ITI  $p > 0.9999$ , Avoidance Movement vs ITI Movement  $p > 0.9999$ , Avoidance Post-Movement vs ITI Post-Movement  $p = 0.0017$ ;  $N = 9$  mice, Avoidance  $n = 165$  trials, ITI  $n = 211$  trials). (P) The change in dmPFC-BLA calcium signal between pre-movement and post-movement periods is significantly greater for avoidance movements compared to ITI movements of similar durations (Unpaired T-test  $p = 0.0473$ ;  $N = 9$  mice, Avoidance  $n = 165$  trials, ITI  $n = 208$  trials). ns = not significant, \*  $p \leq 0.05$ , \*\*  $p \leq 0.01$ , \*\*\*  $p \leq 0.001$ , \*\*\*\*  $p \leq 0.0001$ .
